# Supplementary material for: Identification and Therapeutic Intervention of Coactivated Anaplastic Lymphoma Kinase, Fibroblast Growth Factor Receptor 2, and Ephrin Type‐A Receptor 5 Kinases in Hepatocellular Carcinoma
Source: PubMed Central journal article supplement — Hepatology. 2018 Mar 24;69(2):573–86. doi: 10.1002/hep.29792 (PMC6586030; doi:10.1002/hep.29792), 2018-03-24
Supplement: HEP-69-573-s001.pdf [file HEP-69-573-s001.pdf]

---

## **Supporting Information**

### **Identification and Therapeutic Intervention of Co-activated ALK, FGFR2 and EphA5 Kinases in Hepatocellular Carcinoma**

**This word file includes: Supporting Materials and Methods; Supporting Table S2 and S4; Supporting Figure Legends**

**Other supporting information includes: Supporting Tables S1, S3 and S5**

#### **Supporting Materials and Methods**

##### **Immunoprecipitation and Immunoblotting**

For immunoblotting, protein extracts were prepared by washing twice in cold PBS followed by lysis with SDS-lysis buffer (50 mM Tris-HCl, pH 7.4, 2% SDS). Lysates were boiled for 10 min and then subjected to SDS-PAGE. For immunoprecipitation and co-immunoprecipitation, cells were washed twice with cold PBS followed by solubilization in cold NP-40 lysis buffer (50 mM Tris-HCl, pH 7.4, 1% NP-40, 150 mM NaCl, 1 mM EDTA, 1 mM NaF, 0.25% Sodium deoxycholate, 1 mM PMSF, 1×Cocktail). Then, the lysates were centrifuged at 14,000×g for 20 min at 4°C to remove the cell debris. Equal amounts of proteins in lysis buffer were used for incubation with indicated antibodies or control IgG separately overnight at 4°C, following by immunoprecipitation with protein A/G-conjugated agarose beads (Santa Cruz, Paso Robles, CA) at 4°C for 3 h. Samples were centrifuged at 2,000×rpm for 5

min at 4°C and washed with NP-40 lysis buffer for three times. The precipitates were boiled in SDS-lysis buffer for 10 min and the supernatants were collected and subjected to immunoblotting analysis. Immunoblotting analyses were performed according to the antibody manufacturer's recommendations. Antibodies against  $\beta$ -Actin, AKT, p-AKT, ERK1/2, p-ERK1/2, ALK, p-STAT3, STAT3, p-p38, p38, p-JNK, JNK, PARP, Caspase-3, ACK1, TXK, TNK1, TrkB, EGFR, HGFR, Insulin R, ABL1, FRK, p-FRS2 $\alpha$ , FRS2 $\alpha$  and Hsp70 were obtained from Cell Signaling Technology (Danvers, MA), antibodies against EphA5 and Hsp90 were from Santa Cruz, antibodies against LTK, p-EphA5, p-ALK and FGFR2 were from Genetex (Irvine, CA), p-FGFR2 was from Abcam (Cambridge, MA), antibodies against EphA1, EphA3, EphB2 and EphB3 were obtained from ABclonal (Woburn, MA).

### **SNP array analysis**

Cells were seeded in 100-mm dishes and incubated at 37°C for 24 h, then the cells were trypsinized and collected. Genomic DNA was extracted and subjected to Affymetrix Genome-Wide Human Mapping SNP6.0 Array. Genomic DNA extraction, amplification, array hybridization and data analysis were conducted by Shanghai Biotechnology Co (Shanghai, China).

### **PU-H71 beads pull down assay**

PU-H71 beads and control beads were synthesized by HaBo Medical Technology Co., Ltd (Nanjing, China) as previously reported with some modifications.<sup>(1)</sup> Cells were

seeded in 100-mm dishes and incubated at 37°C for 24 h and then cells were washed twice with cold PBS followed by solubilization in Felts buffer (20 mM HEPES, 50 mM KCl, 5 mM MgCl<sub>2</sub>, 0.01% NP-40, freshly prepared 20 mM Na<sub>2</sub>MoO<sub>4</sub>, pH 7.2–7.3) supplemented with protease and phosphatase inhibitors as previously described. The lysates were centrifuged at 14,000×g for 20 min at 4°C to remove the cell debris. PU-H71 beads and control beads were washed three times in lysis buffer, and then 80 µL beads were incubated with cell lysates (250 µg) overnight at 4°C. Following incubation, bead conjugates were washed five times with the lysis buffer and proteins in the pull-down were analyzed by immunoblotting.

### **Cell viability assay**

Cells were seeded in 96-well plates at the density of 3,000 cells/well in triplicates. After incubation overnight, cells were exposed to indicated concentrations of compounds and incubated at 37°C for another 72 h. Then, the cells were fixed with 10% cold trichloroacetic acid, washed with distilled water, and stained with 4 mg/mL sulforhodamine B (SRB, Sigma, St. Louis, MO) in 1% acetic acid. SRB in the cells was dissolved in 10 mmol/L Tris-HCl and measured at 560 nm using spectra-MAX190 (Molecular Devices, Sunnyvale, CA).

### **Apoptosis analysis**

Cells were seeded in 6-well plates at a density of  $2 \times 10^5$  cells/well. After incubation overnight, cells were exposed to indicated concentrations of compounds and

incubated at 37°C for another 48 h. Then, the cells were trypsinized and washed once with cold PBS. Aliquots of the cells were re-suspended in 500  $\mu$ L of binding buffer and stained with 5  $\mu$ L of Annexin V-FITC and 5  $\mu$ L of PI working solution (BD Biosciences) for 15 min at room temperature in the dark. Then, analysis was performed using a Becton-Dickinson FACS Calibur flow cytometer (BD Biosciences). Data was analyzed using FlowJo software (FlowJo LLC, Ashland, OR).

### **RNA interference**

Cells were seeded in 6-well plates at a density of  $2 \times 10^5$  cells/well or 96-well plates at a density of 3,000 cells/well. After 24 h, indicated siRNA oligonucleotides were transfected using Lipofectamine<sup>®</sup> RNAiMAX Transfection Reagent (Invitrogen, Grand Island, NY) according to the manufacturer's instructions. After 72 h, cells were harvested for apoptosis analysis, proliferation detection or subjected to immunoblotting analysis. Negative control, Hsp90, ALK, EphA5, EphA1, EphA3, HGFR, and FGFR2 siRNAs were obtained from Sigma. LTK, TrkB, EphB2, EphB3, FRK, TNK1, TXK, ACK1, ABL1, EGFR and Insulin R siRNAs were obtained from Raybio (Guangzhou, China).

### **Quantitative real-time PCR**

Quantitative real-time PCR was performed using Vii7 Real-Time PCR System (Life Technologies, Carlsbad, CA). For detection of gene expression, total RNA was extracted with TRIzol reagent (Invitrogen, Grand Island, NY) and subjected to reverse

transcription with PrimeScript<sup>®</sup> RT reagent Kit (Takara, Mountain View, CA). PCR reactions were performed with SYBR<sup>®</sup> Premix Ex Taq<sup>™</sup> kit (Takara). Primers for ALK, FGFR2, EphA5 and  $\beta$ -Actin were synthesized by Sangon (Shanghai, China).

Primers used for RT-PCR were listed as follows:

$\beta$ -Actin Forward: CATGTACGTTGCTATCCAGGC;

Reverse: CTCCTTAATGTCACGCACGAT

ALK Forward: TTCATCGCAGCCGATATGG;

Reverse: GGCATCTCCTTAGAACGCTCT

FGFR2 Forward: AGCACCATACTGGACCAACAC;

Reverse: GGCAGCGAAACTTGACAGTG

EphA5 Forward: GTGACCGATGAACCTCCCAAA;

Reverse: CCAGGTCTGCACACTTGACAG

### Supporting Tables

**Supporting Table S2.** The list of 17 commonly over-activated kinases and their corresponding inhibitors

| <b>Kinase over-activated<br/>In number of cell lines</b> | <b>Kinase</b> | <b>Inhibitor</b> |
|----------------------------------------------------------|---------------|------------------|
| 8                                                        | EphB3         | Dasatinib        |
|                                                          | TrkB          | GNF-5837         |
|                                                          | ALK           | Ceritinib        |
|                                                          | EphA3         | Dasatinib        |
|                                                          | EphA5         | Dasatinib        |
|                                                          | LTK           | Ceritinib        |
|                                                          | HGFR          | SGX-523          |
|                                                          | EphB2         | Dasatinib        |
| 7                                                        | FRK           | Dasatinib        |
|                                                          | TNK1          | XMD8-92          |
|                                                          | TXK           | Lck inhibitor 2  |
|                                                          | ACK1          | AIM-100          |
|                                                          |               |                  |

|   |           |            |
|---|-----------|------------|
|   | FGFR2     | AZD4547    |
| 6 | ABL1      | Imatinib   |
|   | EphA1     | Dasatinib  |
| 5 | EGFR      | Gefitinib  |
|   | Insulin R | Linsitinib |

**Supporting Table S4.** The specific siRNA sequences used in this study

| Target gene | siRNA sequences              |
|-------------|------------------------------|
| ALK         | 1: CGAGGAUACCAUUCUGAAAdTdT   |
|             | 2: GAGACAUUGCUGCCAGAAAdTdT   |
| FGFR2       | 1: UUAGUUGAGGAUACCACAUUAdTdT |
|             | 2: GGCCAACACUGUCAAGUUUdTdT   |
| Hsp90       | 1: GCUUGACAGAUCCCAGUAAAdTdT  |
|             | 2: GCUGGUGCAGAUAUUCUCUAdTdT  |
| ABL1        | 1: CCACCAAGCCUUUGAAACAdTdT   |
|             | 2: GGAGAUAAACACUCUAAGCAdTdT  |
| EphA1       | 1: GAAACAUCUUGGUGAAUCAdTdT   |
|             | 2: CUCUGAGACUGGUGAAGAAAdTdT  |
| EphA3       | 1: CACUGAGAUUAGAGAAGUAdTdT   |
|             | 2: GCAGGUGUGAGAAUAAUUAdTdT   |
| EphA5       | 1: GAGAAUGGCUCUUUAGAUAdTdT   |
|             | 2: GGAAAGACGUGUCAUUAUUAdTdT  |
| EphB2       | 1: CGGACAAGCUGCAACACUAdTdT   |
|             | 2: CCUUCAACCUCUAUUACUAdTdT   |
| EphB3       | 1: GCGAGUCAAGCCAGAACAAdTdT   |
|             | 2: CACUCAAGCUCUACUGCAAdTdT   |
| ACK1        | 1: GCAAGUCGUGGAUGAGUAAAdTdT  |
|             | 2: CGGACAGGAUUGACGAACUdTdT   |
| TXK         | 1: GGAAAGCTTAGGAAGGAAAdTdT   |
|             | 2: GTACGGAGGCTGCCATAAAAdTdT  |
| TNK1        | 1: GCATAGATGGAGACAGAAAdTdT   |
|             | 2: GAGTTGCAGAGGAAGATTAdTdT   |
| FRK         | 1: GGAGTACCTAGAACCCTATdTdT   |
|             | 2: GGAGUACCUAGAACCCUAUdTdT   |
| TrkB        | 1: GAATTGACGATGGTGCAAAdTdT   |
|             | 2: CCTAATATGTATTGGGATGdTdT   |
| Insulin R   | 1: GAACAAGGCTCCCAGAGGTdTdT   |
|             | 2: ACGGAGACCTGAAGAGCTAdTdT   |

|      |                               |
|------|-------------------------------|
| LTK  | 1: GTGGCAACCTCAACACTGAdTdT    |
|      | 2: GGATGGCACGAGATATCTAdTdT    |
| EGFR | 1: CGCAAAGTGTGTAACGGAATAAdTdT |
|      | 2: CTGACTCCGTCCAGTATTGATdTdT  |
| HGFR | 1: GGCCCAGAUACCAGAAUAAAdTdT   |
|      | 2: GGGCCAAGAAAUAUGAAAAdTdT    |

### Supporting Figure Legends

**Supporting Figure S1.** ALK, FGFR2 and EphA5 collaborate to regulate the viability of HCC cells through AKT-dependent, ERK-dependent and p38-dependent pathways.

**(A-B)** ZIP177 and SMMC-7721 cells were transfected with a customized pre-designed RNAi library against 17 kinases for 72 h. Cell viability was measured by SRB assay **(A)**. Bars represent means  $\pm$  SD. The efficacy of two individual siRNAs against each kinase was detected by immunoblotting **(B)**. **(C)** IC<sub>50</sub> values of the kinase inhibitors against ZIP177 and SMMC-7721 cells were assessed by SRB assay. Bars represent means  $\pm$  SD. **(D-E)** ZIP177 and SMMC-7721 were treated with indicated kinase inhibitors at 1  $\mu$ M, alone or in combination, for 72 h. Cell viability was measured by SRB assay. Bars represent means  $\pm$  SD. **(F)** QGY-7703, SK-Hep-1, Hep3B, HepG2, BEL-7402 and Huh-7 cells were treated with ceritinib (1  $\mu$ M), AZD4547 (1  $\mu$ M) and dasatinib (1  $\mu$ M), alone or in combination, for 72 h. Cell viability was assessed by SRB assay. Bars represent means  $\pm$  SD. **(G)** LO2 and GSY-7701 cells were treated with ceritinib (1  $\mu$ M), AZD4547 (1  $\mu$ M) and dasatinib (1  $\mu$ M), alone or in combination, for 72 h. Cell viability was assessed by SRB assay. Bars represent means  $\pm$  SD. **(H-I)** SMMC-7721 cells were transfected with ALK,

FGFR2 and EphA5 siRNAs, alone or in combination, for 72 h. Cell viability was assessed by SRB assay **(H)**. Cell lysates were subjected to immunoblotting **(I)**. **(J)** ZIP177 and SMMC-7721 were transfected with LTK, FGFR2 and EphA5 siRNAs, alone or in combination, for 72 h. Cell viability was assessed by SRB assay. Bars represent means  $\pm$  SD.

**Supporting Figure S2.** ALK, FGFR2 and EphA5 are stringent client proteins of Hsp90. **(A)** SMMC-7721 cells were treated with ganetespib at 0.1  $\mu$ M for 6, 12, 24 and 48 h. The expression of ALK, FGFR2 and EphA5 were detected by immunoblotting. **(B)** SMMC-7721 cells were treated with ganetespib at 0.1  $\mu$ M for 24 h. The mRNA expression level of ALK, FGFR2 and EphA5 was analyzed by Real Time PCR. Bars represent means  $\pm$  SD.

**Supporting Figure S3.** Hsp90 inhibition impacts cell growth through abrogating ALK, FGFR2 and EphA5 activities *in vitro* and *in vivo*. **(A)** LO2 and QSG-7701 cells were treated with Hsp90 inhibitors ganetespib and NVP-AUY922 for 72 h. Cell viability was assessed by SRB assay. **(B-D)** ZIP177 and SMMC-7721 cells were treated with ganetespib (0.01, 0.1 and 1  $\mu$ M) for 48 or 72 h. Cell viability was assessed by SRB assay **(B)**, Cell apoptosis was analyzed by flow cytometry **(C)**, Cell lysates were subjected to immunoblotting analysis **(D)**. Bars represent means  $\pm$  SD. **(E)** ZIP177 and SMMC-7721 cells were treated with ganetespib (0.01, 0.1, 1  $\mu$ M) for 24h, cell lysate were subjected to immunoblotting analysis with indicated antibodies.



(F) Mice bearing SMMC-7721 xenografts were treated with vehicle or ganetespib (10 mg/kg or 30 mg/kg, three times per week) for consecutive four weeks, the body weights of mice in each group were measured three times a week.

**Supporting Figure S4.** Abrogating ALK, FGFR2 and EphA5 activities leads to HCC patient-derived xenograft growth suppression. (A) Mice bearing HCC patient derived xenograft model LI0752 were treated with vehicle or ceritinib (25 mg/kg), AZD4547 (12.5 mg/kg), dasatinib (25 mg/kg), individually or in combination, once a day for consecutive 3 weeks. Body weight was measured twice a week, Bars represent means  $\pm$  SEM, n=6. (B) Mice bearing HCC patient derived xenograft model LI0752 were treated with vehicle or ganetespib (30 mg/kg or 50 mg/kg, three times per week). Body weight was measured twice a week, Bars represent means  $\pm$  SEM, n=6. (C) Tumor lysates were prepared and subjected to immunoblotting analysis with indicated antibodies.

## Reference

1. Taldone T, Zatorska D, Patel PD, Zong H, Rodina A, Ahn JH, et al. Design, synthesis, and evaluation of small molecule Hsp90 probes. *Bioorg Med Chem* 2011;19:2603-2614.

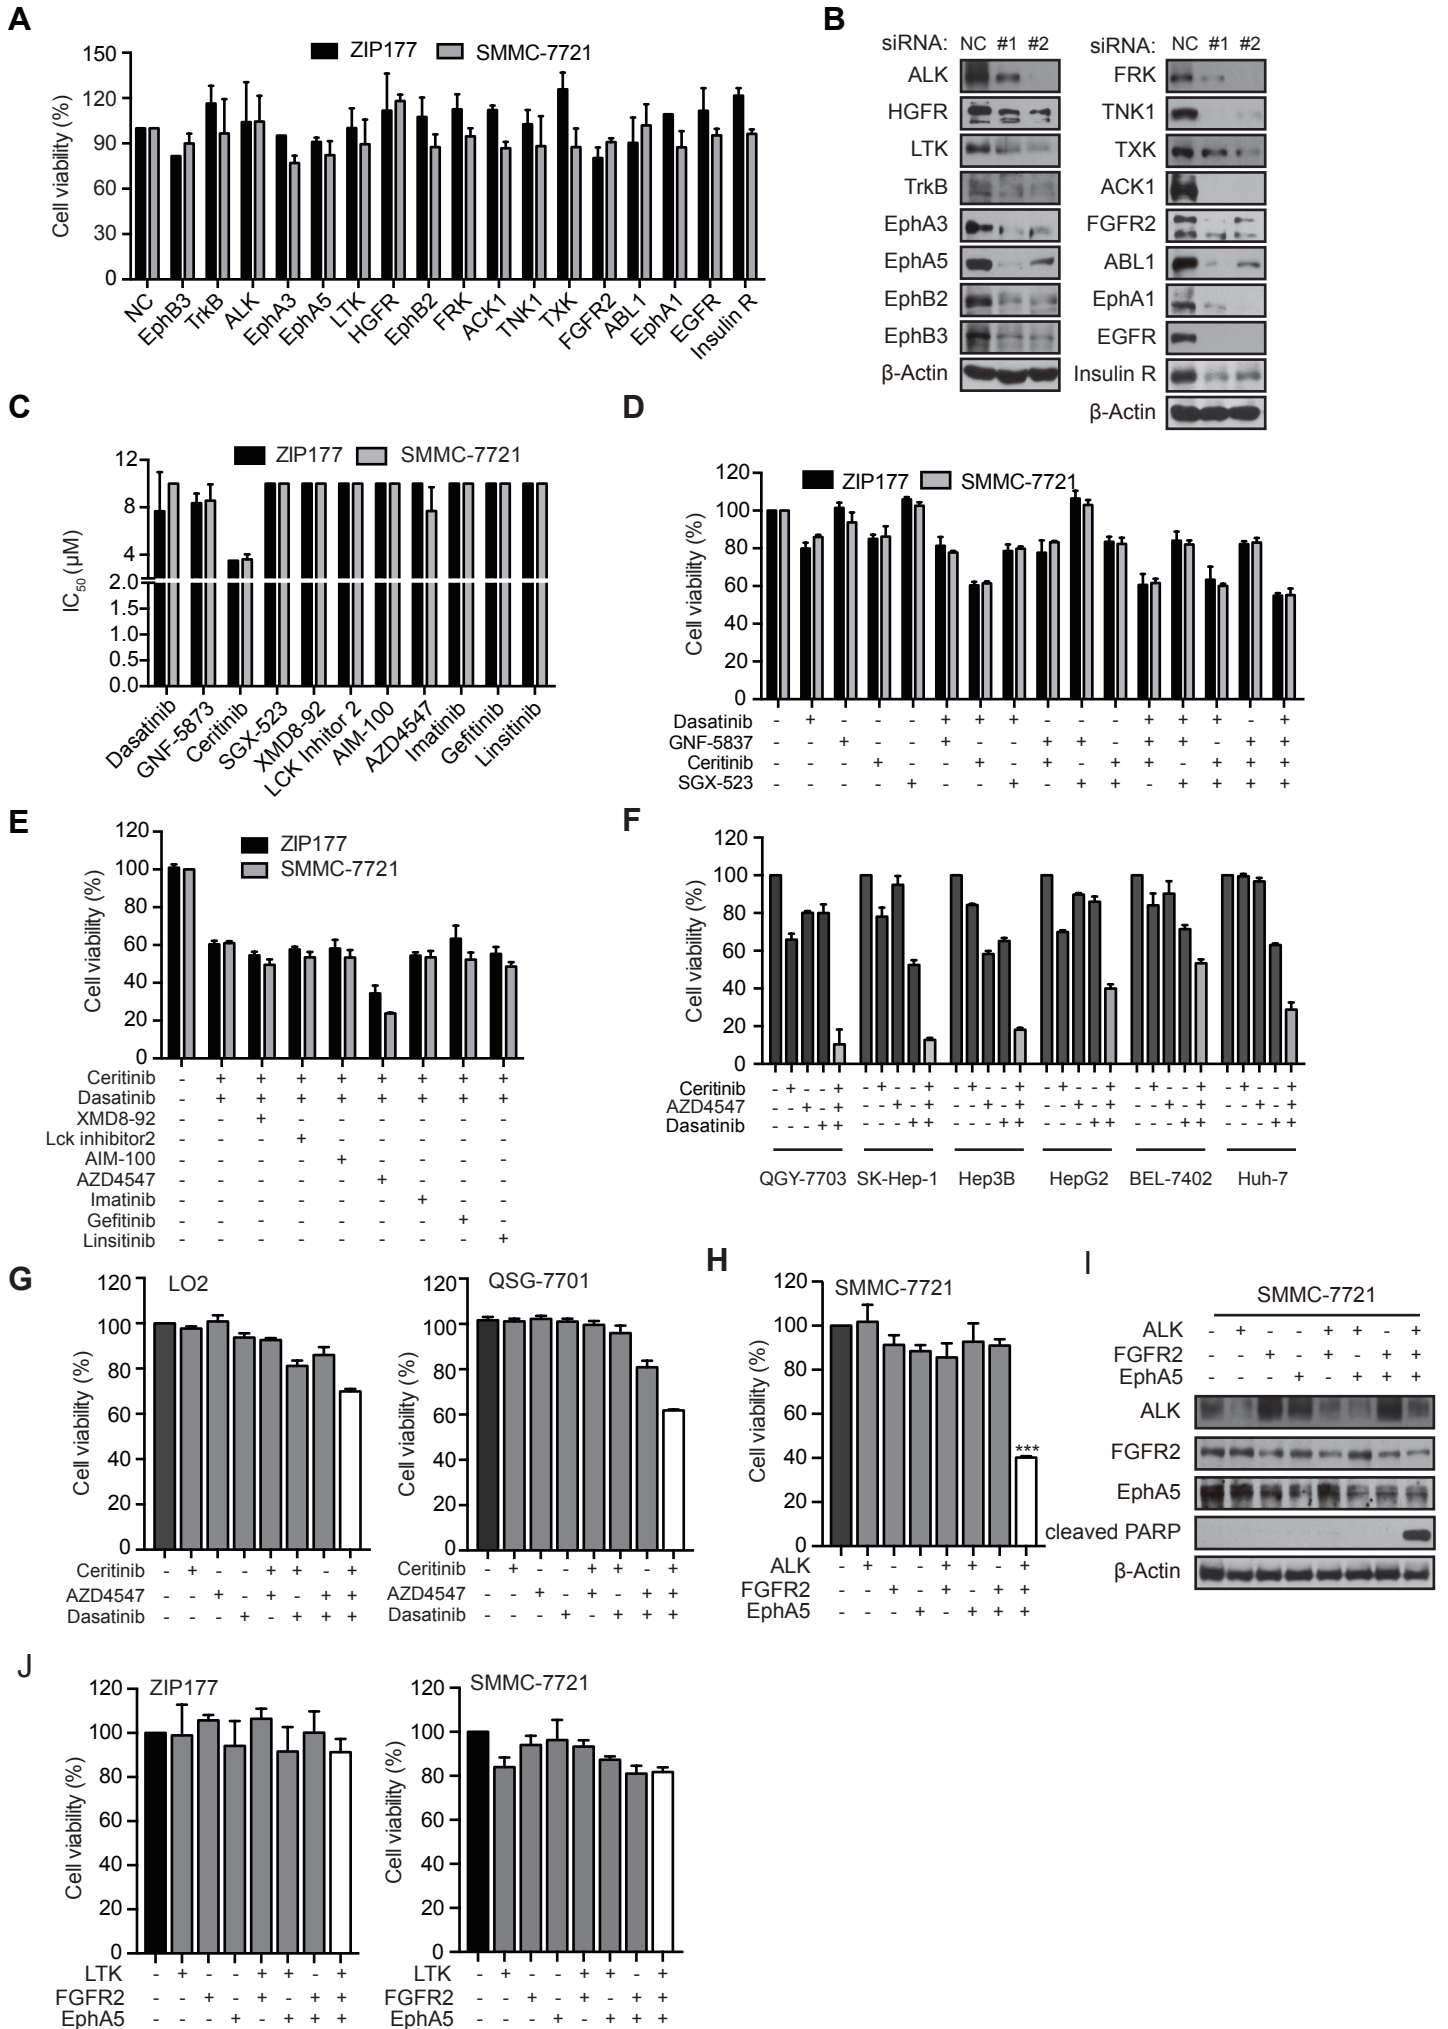

Supporting Figure S2

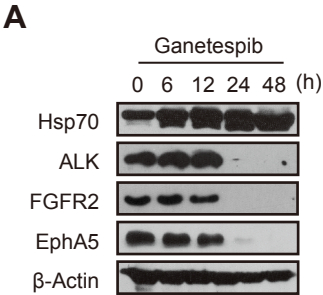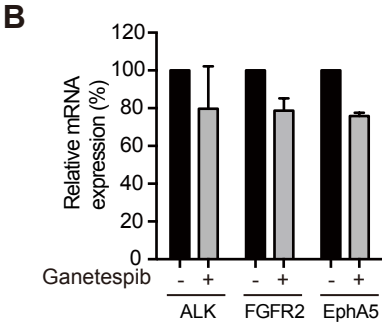

Supporting Figure S3

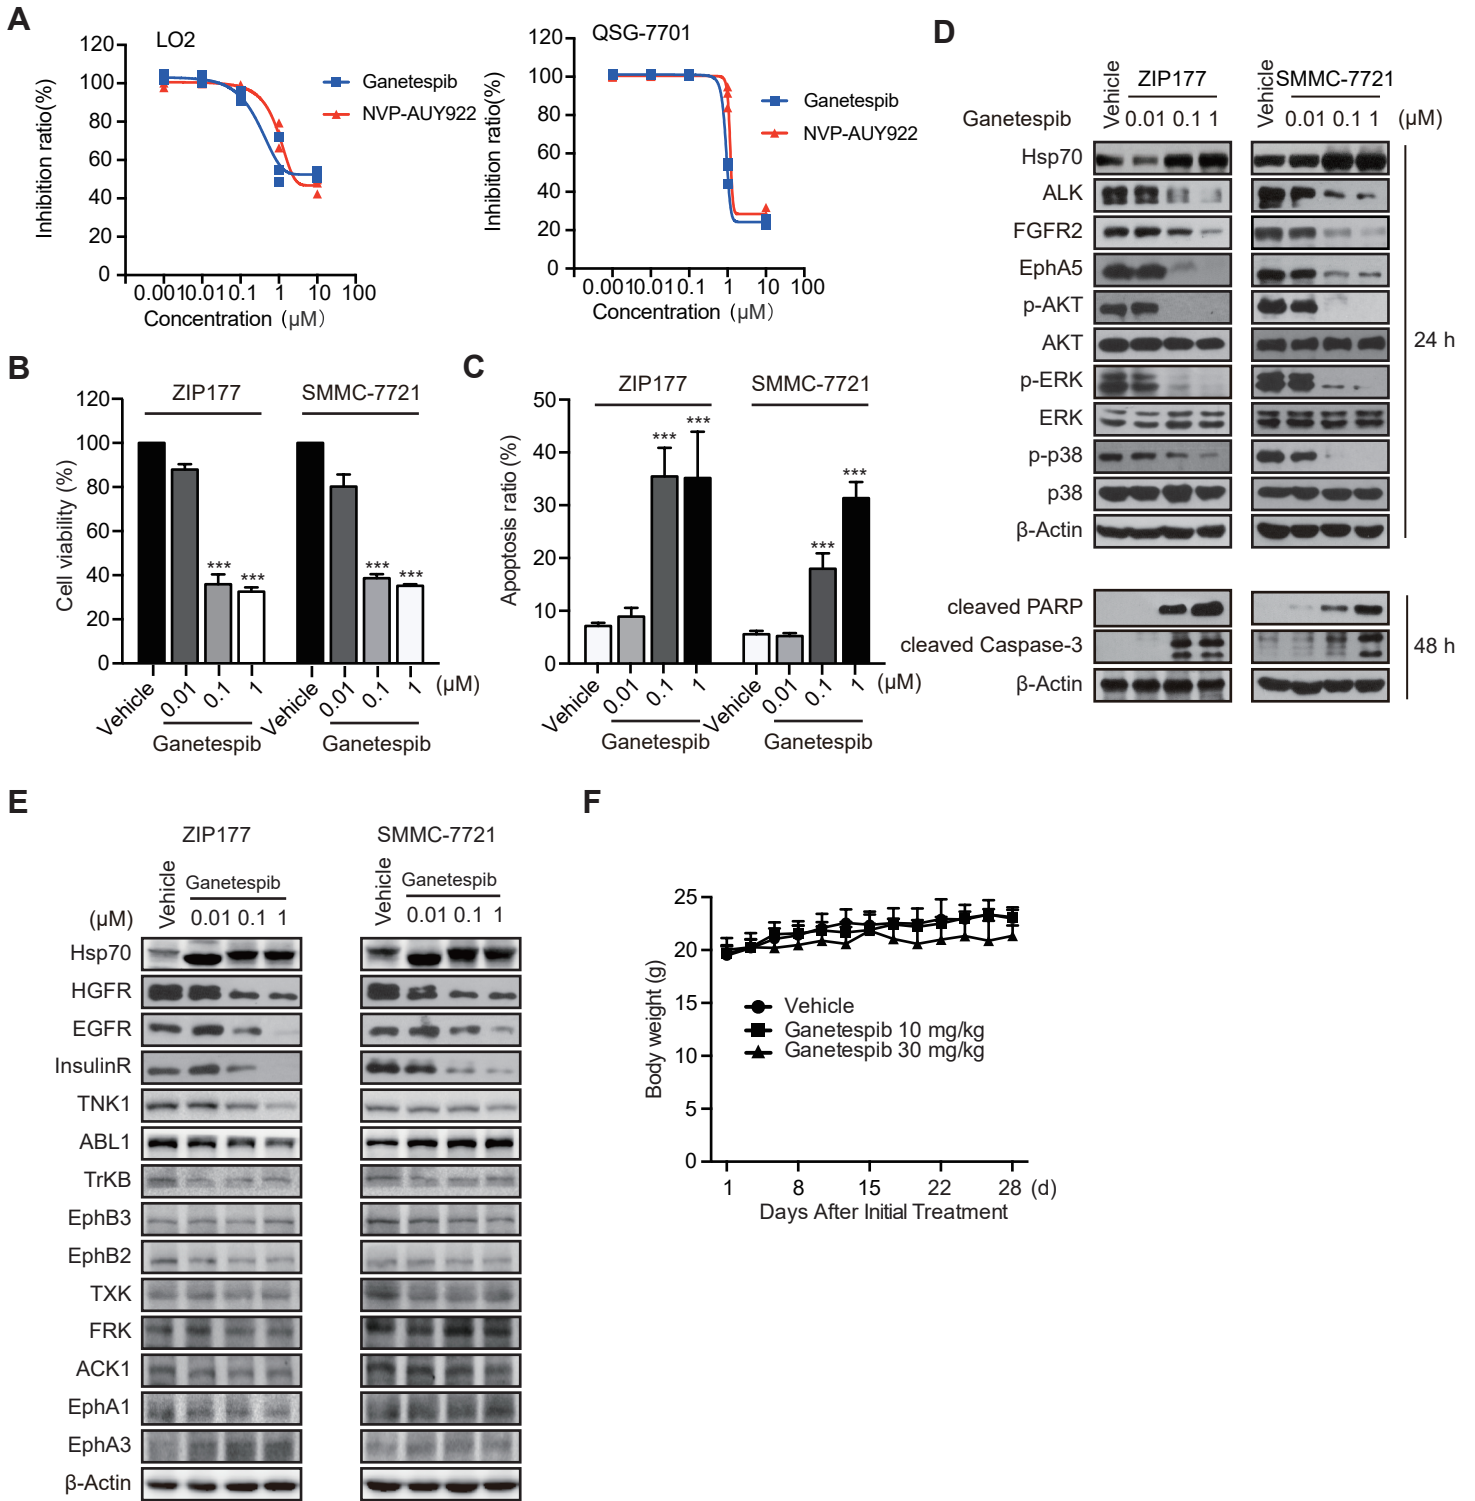

**Supporting Table S1:** The basal phosphorylation of 71 kinases in 8 HCC cell lines

**RayBio® Phosphorylation Antibody Array I**

**Normalization (with Background Subtraction)**

| <b>Cell line<br/>Kinase</b> | <b>BEL-7402</b> | <b>SMMC-7721</b> | <b>HepG2</b> | <b>Hep3B</b> | <b>SK-Hep-1</b> | <b>Huh-7</b> | <b>QGY-7703</b> | <b>ZIP177</b> |
|-----------------------------|-----------------|------------------|--------------|--------------|-----------------|--------------|-----------------|---------------|
| POS                         | 5394.6          | 5394.6           | 5394.6       | 5394.6       | 5394.6          | 5394.6       | 5394.6          | 5394.6        |
| NEG                         | 6.8             | 3.8              | 1.4          | 1.8          | 2.7             | 1.4          | 1.4             | 1.0           |
| ABL1                        | 194.5           | 215.3            | 274.1        | 450.9        | 257.3           | 172.5        | 403.6           | 235.0         |
| ACK1                        | 226.0           | 247.4            | 309.2        | 471.8        | 302.1           | 208.6        | 437.3           | 268.5         |
| ALK                         | 201.0           | 244.7            | 304.5        | 546.8        | 300.7           | 190.6        | 477.0           | 279.1         |
| Axl                         | 181.5           | 190.3            | 201.1        | 214.7        | 244.4           | 136.5        | 235.9           | 210.1         |
| Blk                         | 82.5            | 103.9            | 125.2        | 141.8        | 105.9           | 90.1         | 121.9           | 131.8         |
| BMX                         | 213.0           | 207.7            | 239.5        | 253.8        | 251.2           | 161.4        | 214.3           | 197.0         |
| Btk                         | 139.5           | 140.3            | 169.3        | 172.8        | 173.1           | 109.9        | 134.0           | 129.3         |
| Csk                         | 45.0            | 53.3             | 89.2         | 56.0         | 52.9            | 40.3         | 38.9            | 57.2          |
| Dtk                         | 97.0            | 122.9            | 255.1        | 477.2        | 169.7           | 100.4        | 293.0           | 139.9         |
| EGFR                        | 545.0           | 257.2            | 111.9        | 930.8        | 211.1           | 471.7        | 289.5           | 274.7         |
| EphA1                       | 180.5           | 202.3            | 368.0        | 708.8        | 265.4           | 179.4        | 474.5           | 247.4         |
| EphA2                       | 111.0           | 102.8            | 146.1        | 32.4         | 149.3           | 81.5         | 140.0           | 110.6         |
| EphA3                       | 200.0           | 251.2            | 295.0        | 545.4        | 307.5           | 193.6        | 443.3           | 274.7         |
| EphA4                       | 51.0            | 50.6             | 87.7         | 0.0          | 65.8            | 31.8         | 0.0             | 33.6          |
| EphA5                       | 190.0           | 243.6            | 310.6        | 602.8        | 280.4           | 178.1        | 449.4           | 270.4         |
| EphA6                       | 126.5           | 121.8            | 175.9        | 112.1        | 164.3           | 94.4         | 178.0           | 108.2         |
| EphA7                       | 155.5           | 190.3            | 218.6        | 417.8        | 230.8           | 137.3        | 344.0           | 212.6         |

|                           |       |       |       |       |       |       |       |       |
|---------------------------|-------|-------|-------|-------|-------|-------|-------|-------|
| EphA8                     | 103.0 | 92.4  | 131.8 | 23.6  | 141.9 | 75.1  | 126.2 | 97.0  |
| EphB1                     | 79.0  | 72.3  | 99.6  | 0.0   | 107.3 | 59.2  | 67.4  | 65.3  |
| EphB2                     | 197.0 | 268.1 | 381.8 | 651.4 | 279.7 | 169.5 | 458.9 | 294.6 |
| EphB3                     | 327.5 | 408.4 | 523.6 | 777.6 | 439.9 | 303.4 | 606.7 | 466.8 |
| EphB4                     | 19.5  | 26.1  | 45.5  | 34.4  | 29.9  | 22.3  | 24.2  | 26.7  |
| EphB6                     | 157.0 | 183.8 | 219.6 | 370.6 | 213.8 | 138.2 | 332.7 | 201.4 |
| ErbB2                     | 138.0 | 157.1 | 331.5 | 571.1 | 198.2 | 148.1 | 407.9 | 177.2 |
| ErbB3                     | 109.5 | 118.0 | 198.7 | 217.4 | 150.7 | 110.3 | 186.7 | 121.8 |
| ErbB4                     | 126.0 | 165.8 | 438.2 | 608.9 | 212.5 | 119.3 | 391.5 | 179.0 |
| FAK                       | 129.5 | 154.4 | 269.4 | 218.7 | 158.8 | 120.2 | 209.1 | 165.3 |
| FER                       | 138.5 | 108.2 | 145.6 | 0.0   | 135.8 | 110.3 | 63.1  | 97.6  |
| FGFR1                     | 94.5  | 96.2  | 217.2 | 190.4 | 133.7 | 92.7  | 188.4 | 97.0  |
| FGFR2                     | 154.5 | 168.6 | 310.2 | 447.5 | 215.2 | 145.1 | 374.2 | 184.0 |
| FGFR2 ( $\alpha$ isoform) | 168.5 | 211.0 | 290.2 | 635.2 | 241.7 | 164.4 | 476.2 | 253.6 |
| Fgr                       | 34.5  | 38.6  | 139.4 | 20.9  | 40.7  | 28.8  | 42.3  | 49.7  |
| FRK                       | 230.5 | 247.4 | 522.1 | 571.7 | 294.6 | 217.2 | 492.6 | 291.5 |
| Fyn                       | 154.5 | 164.8 | 188.3 | 523.1 | 173.8 | 132.6 | 366.4 | 186.5 |
| Hck                       | 166.5 | 156.1 | 178.3 | 16.9  | 174.5 | 128.8 | 110.6 | 149.2 |
| HGFR                      | 203.5 | 244.1 | 334.8 | 744.5 | 255.9 | 177.7 | 534.9 | 248.0 |
| IGF-IR                    | 121.5 | 131.0 | 166.0 | 759.4 | 229.4 | 155.8 | 396.7 | 138.6 |
| Insulin R                 | 168.0 | 197.4 | 329.1 | 587.3 | 271.5 | 388.0 | 479.6 | 210.1 |
| Itk                       | 82.5  | 101.1 | 152.7 | 187.7 | 124.2 | 80.3  | 157.3 | 108.2 |
| JAK1                      | 172.5 | 144.1 | 195.4 | 125.6 | 190.1 | 144.2 | 161.6 | 155.4 |
| JAK2                      | 145.0 | 67.4  | 106.7 | 0.0   | 91.6  | 62.7  | 57.0  | 70.2  |
| JAK3                      | 136.0 | 163.7 | 232.4 | 490.7 | 208.4 | 145.1 | 340.5 | 174.7 |

|                 |       |       |       |       |       |       |       |       |
|-----------------|-------|-------|-------|-------|-------|-------|-------|-------|
| LCK             | 122.0 | 126.7 | 146.5 | 166.7 | 119.5 | 103.0 | 171.1 | 124.3 |
| LTK             | 189.5 | 236.5 | 334.3 | 581.2 | 272.9 | 215.0 | 458.9 | 269.1 |
| Lyn             | 171.0 | 188.1 | 255.6 | 379.4 | 232.8 | 160.9 | 338.8 | 221.3 |
| MATK            | 192.5 | 165.8 | 199.7 | 82.4  | 203.0 | 146.4 | 177.2 | 167.2 |
| M-CSFR          | 97.0  | 125.1 | 200.6 | 457.7 | 129.7 | 96.1  | 231.6 | 130.5 |
| MUSK            | 133.0 | 187.1 | 186.9 | 371.3 | 189.4 | 130.0 | 290.4 | 183.4 |
| NGFR            | 308.0 | 233.8 | 211.0 | 452.3 | 272.9 | 161.8 | 377.7 | 235.6 |
| PDGFR- $\alpha$ | 63.0  | 65.3  | 79.2  | 64.8  | 72.0  | 48.9  | 67.4  | 62.8  |
| PDGFR- $\beta$  | 43.0  | 48.4  | 91.1  | 89.1  | 50.9  | 43.3  | 70.9  | 49.7  |
| PYK2            | 98.0  | 114.2 | 145.6 | 140.4 | 111.3 | 90.6  | 150.4 | 122.5 |
| RET             | 244.0 | 239.8 | 277.4 | 73.6  | 171.1 | 225.3 | 174.6 | 219.4 |
| ROR1            | 4.0   | 32.6  | 30.8  | 0.0   | 34.6  | 23.2  | 65.7  | 24.9  |
| ROR2            | 93.0  | 132.7 | 201.6 | 356.4 | 139.8 | 106.9 | 264.4 | 139.9 |
| ROS             | 157.0 | 214.2 | 310.2 | 465.8 | 223.3 | 157.1 | 388.9 | 243.7 |
| RYK             | 111.0 | 112.0 | 145.1 | 58.7  | 149.3 | 86.3  | 144.3 | 126.2 |
| SCFR            | 112.5 | 112.6 | 212.9 | 309.8 | 158.2 | 110.7 | 234.2 | 135.5 |
| SRMS            | 154.0 | 149.0 | 159.3 | 35.1  | 164.3 | 119.3 | 139.1 | 144.2 |
| SYK             | 330.0 | 154.4 | 188.3 | 215.3 | 179.2 | 125.3 | 223.0 | 161.6 |
| Tec             | 40.0  | 58.7  | 61.2  | 54.7  | 49.6  | 45.1  | 71.7  | 70.2  |
| Tie-1           | 132.0 | 157.1 | 552.5 | 664.9 | 190.1 | 146.8 | 433.8 | 180.3 |
| Tie-2           | 81.5  | 90.3  | 208.2 | 297.7 | 116.8 | 85.4  | 190.1 | 103.8 |
| TNK1            | 398.0 | 406.2 | 427.3 | 293.0 | 386.9 | 347.6 | 409.6 | 447.5 |
| TRKB            | 229.0 | 267.5 | 295.9 | 612.2 | 310.9 | 217.6 | 476.2 | 304.0 |
| TXK             | 218.5 | 252.3 | 297.8 | 436.7 | 297.3 | 206.4 | 408.8 | 276.6 |
| Tyk2            | 118.5 | 142.5 | 209.6 | 202.5 | 141.2 | 110.7 | 191.9 | 166.0 |

|        |       |       |       |       |       |       |       |       |
|--------|-------|-------|-------|-------|-------|-------|-------|-------|
| TYRO10 | 11.0  | 1.1   | 11.9  | 0.0   | 9.5   | 5.6   | 0.0   | 0.0   |
| VEGFR2 | 96.5  | 116.9 | 112.9 | 240.3 | 129.0 | 75.5  | 162.5 | 116.2 |
| VEGFR3 | 160.5 | 176.7 | 206.3 | 420.5 | 231.5 | 138.6 | 296.4 | 185.2 |
| ZAP70  | 138.0 | 175.6 | 206.8 | 393.5 | 200.3 | 136.1 | 295.6 | 170.9 |

**Note: POS: Positive; NEG: Negative**



**Supprting Table S3:** The genetic backgrounds of 17 commonly over-activated kinases  
**Affymetrix Genome-Wide Human Mapping SNP6.0 Array**

**The single nucleotide polymorphism of the 17 commonly over-activated kinases**

| SNP ID     | GeneSymbol | Chr | Chr position | Position in the gene/effect | Codon exchange | AA exchange | Functional Consequence |
|------------|------------|-----|--------------|-----------------------------|----------------|-------------|------------------------|
| rs7041983  | ABL1       | 9   | 133605045    | intronic                    |                | .           |                        |
| rs10793970 | ABL1       | 9   | 133635546    | intronic                    |                | .           |                        |
| rs2696141  | ABL1       | 9   | 133754099    | intronic                    |                | .           |                        |
| rs2855180  | ABL1       | 9   | 133657347    | intronic                    |                | .           |                        |
| rs2789764  | ABL1       | 9   | 133620998    | intronic                    |                | .           |                        |
| rs2855190  | ABL1       | 9   | 133708361    | intronic                    |                | .           |                        |
| rs1800609  | ABL1       | 9   | 133731184    | intronic                    |                | .           |                        |
| rs2253084  | ABL1       | 9   | 133621773    | intronic                    |                | .           |                        |
| rs12005879 | ABL1       | 9   | 133737649    | intronic                    |                | .           |                        |
| rs4740376  | ABL1       | 9   | 133747734    | intronic                    |                | .           |                        |
| rs4740365  | ABL1       | 9   | 133630410    | intronic                    |                | .           |                        |
| rs2791728  | ABL1       | 9   | 133611739    | intronic                    |                | .           |                        |
| rs10901275 | ABL1       | 9   | 133599031    | intronic                    |                | .           |                        |
| rs6597642  | ABL1       | 9   | 133725767    | intronic                    |                | .           |                        |
| rs7862514  | ABL1       | 9   | 133611693    | intronic                    |                | .           |                        |
| rs6597644  | ABL1       | 9   | 133744911    | intronic                    |                | .           |                        |
| rs2583845  | ABL1       | 9   | 133613565    | intronic                    |                | .           |                        |
| rs2855160  | ABL1       | 9   | 133617241    | intronic                    |                | .           |                        |
| rs10901285 | ABL1       | 9   | 133670874    | intronic                    |                | .           |                        |

|            |      |   |           |          |   |
|------------|------|---|-----------|----------|---|
| rs2253070  | ABL1 | 9 | 133621504 | intronic | . |
| rs2855166  | ABL1 | 9 | 133623449 | intronic | . |
| rs3824400  | ABL1 | 9 | 133734075 | intronic | . |
| rs11792273 | ABL1 | 9 | 133754032 | intronic | . |
| rs10901294 | ABL1 | 9 | 133732752 | intronic | . |
| rs11244146 | ABL1 | 9 | 133675143 | intronic | . |
| rs4740366  | ABL1 | 9 | 133630622 | intronic | . |
| rs10901281 | ABL1 | 9 | 133645144 | intronic | . |
| rs946486   | ABL1 | 9 | 133646005 | intronic | . |
| rs4740377  | ABL1 | 9 | 133754220 | intronic | . |
| rs3808816  | ABL1 | 9 | 133746117 | intronic | . |
| rs2855178  | ABL1 | 9 | 133657270 | intronic | . |
| rs7851964  | ABL1 | 9 | 133749766 | intronic | . |
| rs7021981  | ABL1 | 9 | 133739735 | intronic | . |
| rs13300884 | ABL1 | 9 | 133628699 | intronic | . |
| rs3780286  | ABL1 | 9 | 133732698 | intronic | . |
| rs6597643  | ABL1 | 9 | 133725830 | intronic | . |
| rs11244143 | ABL1 | 9 | 133670111 | intronic | . |
| rs11244172 | ABL1 | 9 | 133751526 | intronic | . |
| rs2855194  | ABL1 | 9 | 133735644 | intronic | . |
| rs3808817  | ABL1 | 9 | 133746060 | intronic | . |
| rs3808821  | ABL1 | 9 | 133712801 | intronic | . |
| rs7851946  | ABL1 | 9 | 133719256 | intronic | . |
| rs11244164 | ABL1 | 9 | 133736116 | intronic | . |
| rs7870374  | ABL1 | 9 | 133671066 | intronic | . |

|            |      |   |           |          |   |
|------------|------|---|-----------|----------|---|
| rs2772032  | ABL1 | 9 | 133756793 | intronic | . |
| rs4504690  | ABL1 | 9 | 133663764 | intronic | . |
| rs2855191  | ABL1 | 9 | 133708441 | intronic | . |
| rs3808815  | ABL1 | 9 | 133757695 | intronic | . |
| rs7865403  | ABL1 | 9 | 133748673 | intronic | . |
| rs12340378 | ABL1 | 9 | 133643229 | intronic | . |
| rs2791738  | ABL1 | 9 | 133633507 | intronic | . |
| rs12351264 | ABL1 | 9 | 133756710 | intronic | . |
| rs2791734  | ABL1 | 9 | 133627890 | intronic | . |
| rs2791743  | ABL1 | 9 | 133640777 | intronic | . |
| rs2313569  | ABL1 | 9 | 133610179 | intronic | . |
| rs3808814  | ABL1 | 9 | 133757785 | intronic | . |
| rs2260323  | ABL1 | 9 | 133700786 | intronic | . |
| rs4666194  | ALK  | 2 | 29520085  | intronic | . |
| rs10177364 | ALK  | 2 | 29847957  | intronic | . |
| rs13384022 | ALK  | 2 | 29520832  | intronic | . |
| rs4319896  | ALK  | 2 | 30139849  | intronic | . |
| rs17007920 | ALK  | 2 | 29570906  | intronic | . |
| rs4413121  | ALK  | 2 | 29792216  | intronic | . |
| rs6731230  | ALK  | 2 | 29486078  | intronic | . |
| rs10208167 | ALK  | 2 | 29837275  | intronic | . |
| rs2631987  | ALK  | 2 | 29912163  | intronic | . |
| rs4666262  | ALK  | 2 | 29859805  | intronic | . |
| rs4075919  | ALK  | 2 | 30075237  | intronic | . |
| rs4510175  | ALK  | 2 | 30102582  | intronic | . |

|            |     |   |          |          |   |
|------------|-----|---|----------|----------|---|
| rs4503952  | ALK | 2 | 29756119 | intronic | . |
| rs11127219 | ALK | 2 | 29618550 | intronic | . |
| rs6711471  | ALK | 2 | 29840371 | intronic | . |
| rs12714281 | ALK | 2 | 29691960 | intronic | . |
| rs2541194  | ALK | 2 | 29947235 | intronic | . |
| rs2276549  | ALK | 2 | 29541104 | intronic | . |
| rs17007931 | ALK | 2 | 29578068 | intronic | . |
| rs4666199  | ALK | 2 | 29535197 | intronic | . |
| rs17007916 | ALK | 2 | 29562741 | intronic | . |
| rs12465577 | ALK | 2 | 29715212 | intronic | . |
| rs13399141 | ALK | 2 | 29502569 | intronic | . |
| rs7572088  | ALK | 2 | 29481036 | intronic | . |
| rs7608034  | ALK | 2 | 29868259 | intronic | . |
| rs17716681 | ALK | 2 | 29524432 | intronic | . |
| rs7605970  | ALK | 2 | 29776488 | intronic | . |
| rs4366859  | ALK | 2 | 29682984 | intronic | . |
| rs4525647  | ALK | 2 | 29615419 | intronic | . |
| rs4264531  | ALK | 2 | 30048387 | intronic | . |
| rs2541180  | ALK | 2 | 29986574 | intronic | . |
| rs10187657 | ALK | 2 | 30042217 | intronic | . |
| rs7425108  | ALK | 2 | 29453835 | intronic | . |
| rs4666201  | ALK | 2 | 29542948 | intronic | . |
| rs12618086 | ALK | 2 | 29739002 | intronic | . |
| rs2631988  | ALK | 2 | 29912210 | intronic | . |
| rs6722514  | ALK | 2 | 30119222 | intronic | . |

|            |     |   |          |          |   |
|------------|-----|---|----------|----------|---|
| rs10190119 | ALK | 2 | 29821201 | intronic | . |
| rs4575680  | ALK | 2 | 29770763 | intronic | . |
| rs2541184  | ALK | 2 | 29980221 | intronic | . |
| rs17007974 | ALK | 2 | 29592698 | intronic | . |
| rs1528424  | ALK | 2 | 29477830 | intronic | . |
| rs7580098  | ALK | 2 | 29771727 | intronic | . |
| rs17007682 | ALK | 2 | 29432105 | intronic | . |
| rs12052994 | ALK | 2 | 29851716 | intronic | . |
| rs10205397 | ALK | 2 | 29852264 | intronic | . |
| rs4666260  | ALK | 2 | 29853061 | intronic | . |
| rs17008529 | ALK | 2 | 29947102 | intronic | . |
| rs2541186  | ALK | 2 | 29977099 | intronic | . |
| rs41344745 | ALK | 2 | 29977354 | intronic | . |
| rs7580440  | ALK | 2 | 29977809 | intronic | . |
| rs9973358  | ALK | 2 | 30000281 | intronic | . |
| rs17008743 | ALK | 2 | 30011959 | intronic | . |
| rs6547946  | ALK | 2 | 29780633 | intronic | . |
| rs4280420  | ALK | 2 | 30106142 | intronic | . |
| rs10209375 | ALK | 2 | 29737495 | intronic | . |
| rs1317902  | ALK | 2 | 29449005 | intronic | . |
| rs17007970 | ALK | 2 | 29592531 | intronic | . |
| rs7577363  | ALK | 2 | 29876343 | intronic | . |
| rs4666255  | ALK | 2 | 29823652 | intronic | . |
| rs17729272 | ALK | 2 | 29842485 | intronic | . |
| rs6754787  | ALK | 2 | 30141950 | intronic | . |

|            |     |   |          |          |   |
|------------|-----|---|----------|----------|---|
| rs12465499 | ALK | 2 | 30102136 | intronic | . |
| rs4128317  | ALK | 2 | 29659854 | intronic | . |
| rs4073186  | ALK | 2 | 30043619 | intronic | . |
| rs6547951  | ALK | 2 | 29797217 | intronic | . |
| rs11899406 | ALK | 2 | 29593844 | intronic | . |
| rs2631962  | ALK | 2 | 29922364 | intronic | . |
| rs10186747 | ALK | 2 | 29871576 | intronic | . |
| rs10175802 | ALK | 2 | 29947449 | intronic | . |
| rs4666212  | ALK | 2 | 29613214 | intronic | . |
| rs6547936  | ALK | 2 | 29716266 | intronic | . |
| rs4268897  | ALK | 2 | 29517881 | intronic | . |
| rs4322797  | ALK | 2 | 29666976 | intronic | . |
| rs17008540 | ALK | 2 | 29949771 | intronic | . |
| rs2541169  | ALK | 2 | 29916548 | intronic | . |
| rs7599686  | ALK | 2 | 29533736 | intronic | . |
| rs4233753  | ALK | 2 | 30140540 | intronic | . |
| rs2541205  | ALK | 2 | 29926075 | intronic | . |
| rs4473345  | ALK | 2 | 29767668 | intronic | . |
| rs11682395 | ALK | 2 | 30075802 | intronic | . |
| rs17007760 | ALK | 2 | 29486702 | intronic | . |
| rs2631986  | ALK | 2 | 29911541 | intronic | . |
| rs7563365  | ALK | 2 | 29715714 | intronic | . |
| rs13423991 | ALK | 2 | 29459309 | intronic | . |
| rs7588612  | ALK | 2 | 29481195 | intronic | . |
| rs2001916  | ALK | 2 | 29849076 | intronic | . |

|            |     |   |          |          |   |
|------------|-----|---|----------|----------|---|
| rs1406235  | ALK | 2 | 29499304 | intronic | . |
| rs7564893  | ALK | 2 | 29514769 | intronic | . |
| rs2339548  | ALK | 2 | 29859029 | intronic | . |
| rs3768672  | ALK | 2 | 29417948 | intronic | . |
| rs7599783  | ALK | 2 | 29533782 | intronic | . |
| rs10171094 | ALK | 2 | 29745284 | intronic | . |
| rs7559091  | ALK | 2 | 29863414 | intronic | . |
| rs2339379  | ALK | 2 | 29481537 | intronic | . |
| rs3885973  | ALK | 2 | 29702460 | intronic | . |
| rs17783899 | ALK | 2 | 29523611 | intronic | . |
| rs1969528  | ALK | 2 | 29525069 | intronic | . |
| rs4274561  | ALK | 2 | 30102736 | intronic | . |
| rs13020484 | ALK | 2 | 30097479 | intronic | . |
| rs13399115 | ALK | 2 | 30009179 | intronic | . |
| rs17007869 | ALK | 2 | 29535061 | intronic | . |
| rs4452101  | ALK | 2 | 30009226 | intronic | . |
| rs6547929  | ALK | 2 | 29666856 | intronic | . |
| rs2001915  | ALK | 2 | 29848771 | intronic | . |
| rs12997875 | ALK | 2 | 29434339 | intronic | . |
| rs6754936  | ALK | 2 | 29685945 | intronic | . |
| rs7561657  | ALK | 2 | 29574604 | intronic | . |
| rs747148   | ALK | 2 | 29972678 | intronic | . |
| rs6711746  | ALK | 2 | 29438549 | intronic | . |
| rs7573553  | ALK | 2 | 29591769 | intronic | . |
| rs17008447 | ALK | 2 | 29888337 | intronic | . |

|            |     |   |          |          |         |         |          |
|------------|-----|---|----------|----------|---------|---------|----------|
| rs7592571  | ALK | 2 | 29767894 | intronic |         | .       |          |
| rs10445907 | ALK | 2 | 29727228 | intronic |         | .       |          |
| rs6547920  | ALK | 2 | 29573090 | intronic |         | .       |          |
| rs1881420  | ALK | 2 | 29416481 | exonic   | GTA-GCA | Val-Ala | missense |
| rs11691898 | ALK | 2 | 29751116 | intronic |         | .       |          |
| rs4666266  | ALK | 2 | 29872209 | intronic |         | .       |          |
| rs11679467 | ALK | 2 | 29486280 | intronic |         | .       |          |
| rs2879497  | ALK | 2 | 29950291 | intronic |         | .       |          |
| rs1406237  | ALK | 2 | 29499625 | intronic |         | .       |          |
| rs10184494 | ALK | 2 | 29513501 | intronic |         | .       |          |
| rs1104869  | ALK | 2 | 29454701 | intronic |         | .       |          |
| rs13001260 | ALK | 2 | 29578251 | intronic |         | .       |          |
| rs6719019  | ALK | 2 | 29796453 | intronic |         | .       |          |
| rs4665447  | ALK | 2 | 29446721 | intronic |         | .       |          |
| rs11127215 | ALK | 2 | 29525654 | intronic |         | .       |          |
| rs6753491  | ALK | 2 | 30006764 | intronic |         | .       |          |
| rs3923028  | ALK | 2 | 29685596 | intronic |         | .       |          |
| rs17783776 | ALK | 2 | 29521005 | intronic |         | .       |          |
| rs1406236  | ALK | 2 | 29499442 | intronic |         | .       |          |
| rs4578812  | ALK | 2 | 30119773 | intronic |         | .       |          |
| rs6734066  | ALK | 2 | 29978379 | intronic |         | .       |          |
| rs4296388  | ALK | 2 | 29609076 | intronic |         | .       |          |
| rs9309673  | ALK | 2 | 29839915 | intronic |         | .       |          |
| rs12621412 | ALK | 2 | 29796202 | intronic |         | .       |          |
| rs11885445 | ALK | 2 | 29438655 | intronic |         | .       |          |



|            |     |   |          |          |   |
|------------|-----|---|----------|----------|---|
| rs10193883 | ALK | 2 | 29852825 | intronic | . |
| rs13383676 | ALK | 2 | 29708704 | intronic | . |
| rs1670289  | ALK | 2 | 29434034 | intronic | . |
| rs10206377 | ALK | 2 | 29782226 | intronic | . |
| rs11694445 | ALK | 2 | 30034279 | intronic | . |
| rs2541183  | ALK | 2 | 29980408 | intronic | . |
| rs2257135  | ALK | 2 | 29948698 | intronic | . |
| rs1104870  | ALK | 2 | 29454418 | intronic | . |
| rs6547924  | ALK | 2 | 29627861 | intronic | . |
| rs3885975  | ALK | 2 | 29702436 | intronic | . |
| rs6708231  | ALK | 2 | 29873120 | intronic | . |
| rs872674   | ALK | 2 | 29949616 | intronic | . |
| rs6547937  | ALK | 2 | 29716326 | intronic | . |
| rs17008524 | ALK | 2 | 29945322 | intronic | . |
| rs2631939  | ALK | 2 | 29977925 | intronic | . |
| rs7421353  | ALK | 2 | 29641874 | intronic | . |
| rs6740714  | ALK | 2 | 29731788 | intronic | . |
| rs17041287 | ALK | 2 | 29847112 | intronic | . |
| rs11684750 | ALK | 2 | 29640505 | intronic | . |
| rs3927337  | ALK | 2 | 29577405 | intronic | . |
| rs11890191 | ALK | 2 | 30043558 | intronic | . |
| rs1406233  | ALK | 2 | 29514509 | intronic | . |
| rs4666283  | ALK | 2 | 30073650 | intronic | . |
| rs11886642 | ALK | 2 | 29592365 | intronic | . |
| rs10195355 | ALK | 2 | 29542123 | intronic | . |

|            |     |   |          |          |   |
|------------|-----|---|----------|----------|---|
| rs10167952 | ALK | 2 | 29809505 | intronic | . |
| rs4233740  | ALK | 2 | 29758503 | intronic | . |
| rs12998454 | ALK | 2 | 29954652 | intronic | . |
| rs4666189  | ALK | 2 | 29502690 | intronic | . |
| rs13005169 | ALK | 2 | 29500455 | intronic | . |
| rs17007646 | ALK | 2 | 29416794 | intronic | . |
| rs10495773 | ALK | 2 | 29852088 | intronic | . |
| rs4666273  | ALK | 2 | 30011868 | intronic | . |
| rs4350701  | ALK | 2 | 29640557 | intronic | . |
| rs6547945  | ALK | 2 | 29780501 | intronic | . |
| rs6547981  | ALK | 2 | 30106509 | intronic | . |
| rs4402711  | ALK | 2 | 29934963 | intronic | . |
| rs7568222  | ALK | 2 | 29771927 | intronic | . |
| rs12466048 | ALK | 2 | 30002690 | intronic | . |
| rs12466952 | ALK | 2 | 30002793 | intronic | . |
| rs2631956  | ALK | 2 | 29954664 | intronic | . |
| rs7559372  | ALK | 2 | 29487527 | intronic | . |
| rs2631955  | ALK | 2 | 29954416 | intronic | . |
| rs10194138 | ALK | 2 | 29444656 | intronic | . |
| rs2631948  | ALK | 2 | 29986601 | intronic | . |
| rs2247443  | ALK | 2 | 29934975 | intronic | . |
| rs13406263 | ALK | 2 | 29519475 | intronic | . |
| rs12714277 | ALK | 2 | 29586686 | intronic | . |
| rs4408683  | ALK | 2 | 29667326 | intronic | . |
| rs7567732  | ALK | 2 | 29771510 | intronic | . |

|            |     |   |          |          |         |         |          |
|------------|-----|---|----------|----------|---------|---------|----------|
| rs876748   | ALK | 2 | 29512675 | intronic |         | .       |          |
| rs4665479  | ALK | 2 | 30006714 | intronic |         | .       |          |
| rs13412931 | ALK | 2 | 29788934 | intronic |         | .       |          |
| rs11689118 | ALK | 2 | 29716164 | intronic |         | .       |          |
| rs10432709 | ALK | 2 | 30021682 | intronic |         | .       |          |
| rs13011250 | ALK | 2 | 30091906 | intronic |         | .       |          |
| rs11894279 | ALK | 2 | 29467468 | intronic |         | .       |          |
| rs12619049 | ALK | 2 | 29446701 | intronic |         | .       |          |
| rs4438441  | ALK | 2 | 29731165 | intronic |         | .       |          |
| rs6727501  | ALK | 2 | 30087069 | intronic |         | .       |          |
| rs1670283  | ALK | 2 | 29416572 | exonic   | ATC-ACC | Thr-Ile | missense |
| rs13025924 | ALK | 2 | 29795040 | intronic |         | .       |          |
| rs6707371  | ALK | 2 | 30075404 | intronic |         | .       |          |
| rs10180703 | ALK | 2 | 29600620 | intronic |         | .       |          |
| rs13024453 | ALK | 2 | 30067557 | intronic |         | .       |          |
| rs10178161 | ALK | 2 | 30069828 | intronic |         | .       |          |
| rs7575137  | ALK | 2 | 30074066 | intronic |         | .       |          |
| rs6709279  | ALK | 2 | 29417782 | intronic |         | .       |          |
| rs10198871 | ALK | 2 | 29779145 | intronic |         | .       |          |
| rs4499385  | ALK | 2 | 29606824 | intronic |         | .       |          |
| rs7594683  | ALK | 2 | 29704514 | intronic |         | .       |          |
| rs4488615  | ALK | 2 | 29704884 | intronic |         | .       |          |
| rs4261679  | ALK | 2 | 29724183 | intronic |         | .       |          |
| rs4233745  | ALK | 2 | 29793129 | intronic |         | .       |          |
| rs6547975  | ALK | 2 | 30011499 | intronic |         | .       |          |

|            |     |   |          |          |   |
|------------|-----|---|----------|----------|---|
| rs4074252  | ALK | 2 | 30071411 | intronic | . |
| rs4595923  | ALK | 2 | 30048342 | intronic | . |
| rs1881417  | ALK | 2 | 29511480 | intronic | . |
| rs5003770  | ALK | 2 | 29796951 | intronic | . |
| rs11686458 | ALK | 2 | 29671885 | intronic | . |
| rs4128814  | ALK | 2 | 29800482 | intronic | . |
| rs11127238 | ALK | 2 | 30066492 | intronic | . |
| rs11898966 | ALK | 2 | 29646424 | intronic | . |
| rs6716559  | ALK | 2 | 29755934 | intronic | . |
| rs6709762  | ALK | 2 | 29766715 | intronic | . |
| rs13009937 | ALK | 2 | 29558608 | intronic | . |
| rs11897469 | ALK | 2 | 29643071 | intronic | . |
| rs4267473  | ALK | 2 | 29712765 | intronic | . |
| rs4341892  | ALK | 2 | 30061083 | intronic | . |
| rs12617691 | ALK | 2 | 29725908 | intronic | . |
| rs11127241 | ALK | 2 | 30080628 | intronic | . |
| rs11681922 | ALK | 2 | 29442426 | intronic | . |
| rs4349303  | ALK | 2 | 30136530 | intronic | . |
| rs4350702  | ALK | 2 | 30136730 | intronic | . |
| rs11127217 | ALK | 2 | 29568945 | intronic | . |
| rs12620310 | ALK | 2 | 29728909 | intronic | . |
| rs13422847 | ALK | 2 | 29520389 | intronic | . |
| rs10173116 | ALK | 2 | 29728811 | intronic | . |
| rs4356623  | ALK | 2 | 29605508 | intronic | . |
| rs6713380  | ALK | 2 | 29802178 | intronic | . |

|            |     |   |          |          |   |
|------------|-----|---|----------|----------|---|
| rs12464131 | ALK | 2 | 30065138 | intronic | . |
| rs10439521 | ALK | 2 | 29477885 | intronic | . |
| rs10185035 | ALK | 2 | 29719818 | intronic | . |
| rs12987571 | ALK | 2 | 29437842 | intronic | . |
| rs13000043 | ALK | 2 | 29569562 | intronic | . |
| rs12620548 | ALK | 2 | 30090341 | intronic | . |
| rs6729436  | ALK | 2 | 29578564 | intronic | . |
| rs10184885 | ALK | 2 | 29669822 | intronic | . |
| rs6750887  | ALK | 2 | 29739210 | intronic | . |
| rs10171502 | ALK | 2 | 29557564 | intronic | . |
| rs2541199  | ALK | 2 | 29942699 | intronic | . |
| rs13397113 | ALK | 2 | 29462405 | intronic | . |
| rs4665485  | ALK | 2 | 30095846 | intronic | . |
| rs4666275  | ALK | 2 | 30016786 | intronic | . |
| rs11897665 | ALK | 2 | 30041690 | intronic | . |
| rs13407210 | ALK | 2 | 29720219 | intronic | . |
| rs6759800  | ALK | 2 | 29932567 | intronic | . |
| rs11695573 | ALK | 2 | 29682857 | intronic | . |
| rs12996631 | ALK | 2 | 29572299 | intronic | . |
| rs11693439 | ALK | 2 | 29766613 | intronic | . |
| rs10180728 | ALK | 2 | 29788851 | intronic | . |
| rs12623676 | ALK | 2 | 30053342 | intronic | . |
| rs7592354  | ALK | 2 | 29698759 | intronic | . |
| rs17008468 | ALK | 2 | 29904696 | intronic | . |
| rs10176775 | ALK | 2 | 29912318 | intronic | . |

|            |     |   |          |          |   |
|------------|-----|---|----------|----------|---|
| rs4610005  | ALK | 2 | 29892289 | intronic | . |
| rs4503951  | ALK | 2 | 29698383 | intronic | . |
| rs4630722  | ALK | 2 | 30090629 | intronic | . |
| rs12469277 | ALK | 2 | 29609205 | intronic | . |
| rs2245914  | ALK | 2 | 29910540 | intronic | . |
| rs6547948  | ALK | 2 | 29790622 | intronic | . |
| rs11891005 | ALK | 2 | 29600843 | intronic | . |
| rs12623507 | ALK | 2 | 29792763 | intronic | . |
| rs13411869 | ALK | 2 | 29487103 | intronic | . |
| rs6708752  | ALK | 2 | 29536039 | intronic | . |
| rs13419205 | ALK | 2 | 29917524 | intronic | . |
| rs2631959  | ALK | 2 | 29968995 | intronic | . |
| rs17007998 | ALK | 2 | 29595021 | intronic | . |
| rs9973865  | ALK | 2 | 29826784 | intronic | . |
| rs13392455 | ALK | 2 | 29871128 | intronic | . |
| rs13404353 | ALK | 2 | 29616013 | intronic | . |
| rs7591913  | ALK | 2 | 29619971 | intronic | . |
| rs10195189 | ALK | 2 | 29612926 | intronic | . |
| rs11887306 | ALK | 2 | 29600898 | intronic | . |
| rs2631946  | ALK | 2 | 29986208 | intronic | . |
| rs13417904 | ALK | 2 | 30060021 | intronic | . |
| rs11675197 | ALK | 2 | 30101016 | intronic | . |
| rs6547957  | ALK | 2 | 29816800 | intronic | . |
| rs4666271  | ALK | 2 | 29992732 | intronic | . |
| rs6724436  | ALK | 2 | 29727719 | intronic | . |

|            |     |   |          |          |   |
|------------|-----|---|----------|----------|---|
| rs11678427 | ALK | 2 | 29802542 | intronic | . |
| rs4666254  | ALK | 2 | 29823352 | intronic | . |
| rs13387847 | ALK | 2 | 29426938 | intronic | . |
| rs10188389 | ALK | 2 | 30021598 | intronic | . |
| rs13027395 | ALK | 2 | 29573193 | intronic | . |
| rs10206197 | ALK | 2 | 29781843 | intronic | . |
| rs2631994  | ALK | 2 | 29909409 | intronic | . |
| rs13015783 | ALK | 2 | 29434500 | intronic | . |
| rs7574859  | ALK | 2 | 30094209 | intronic | . |
| rs13019456 | ALK | 2 | 29555506 | intronic | . |
| rs2270353  | ALK | 2 | 29940820 | intronic | . |
| rs3923554  | ALK | 2 | 29683227 | intronic | . |
| rs6748797  | ALK | 2 | 29432982 | intronic | . |
| rs13394743 | ALK | 2 | 30042872 | intronic | . |
| rs10178628 | ALK | 2 | 29471420 | intronic | . |
| rs7572957  | ALK | 2 | 29487405 | intronic | . |
| rs12616992 | ALK | 2 | 30080818 | intronic | . |
| rs1406231  | ALK | 2 | 29570266 | intronic | . |
| rs4666176  | ALK | 2 | 29424004 | intronic | . |
| rs3820712  | ALK | 2 | 29430519 | intronic | . |
| rs1406228  | ALK | 2 | 29538642 | intronic | . |
| rs1113643  | ALK | 2 | 29539536 | intronic | . |
| rs1113627  | ALK | 2 | 29579623 | intronic | . |
| rs17008465 | ALK | 2 | 29904447 | intronic | . |
| rs763836   | ALK | 2 | 29905304 | intronic | . |

|            |     |   |          |          |  |   |  |
|------------|-----|---|----------|----------|--|---|--|
| rs10200505 | ALK | 2 | 29905337 | intronic |  | . |  |
| rs4666269  | ALK | 2 | 29943596 | intronic |  | . |  |
| rs10495771 | ALK | 2 | 29999161 | intronic |  | . |  |
| rs17008728 | ALK | 2 | 30005010 | intronic |  | . |  |
| rs10495769 | ALK | 2 | 30005566 | intronic |  | . |  |
| rs4076174  | ALK | 2 | 30075011 | intronic |  | . |  |
| rs4075920  | ALK | 2 | 30075051 | intronic |  | . |  |
| rs17007918 | ALK | 2 | 29569604 | intronic |  | . |  |
| rs10167756 | ALK | 2 | 29597044 | intronic |  | . |  |
| rs10186332 | ALK | 2 | 29607480 | intronic |  | . |  |
| rs12479392 | ALK | 2 | 30065435 | intronic |  | . |  |
| rs13404997 | ALK | 2 | 29431202 | intronic |  | . |  |
| rs4041386  | ALK | 2 | 29917150 | intronic |  | . |  |
| rs12185720 | ALK | 2 | 29505019 | intronic |  | . |  |
| rs3936219  | ALK | 2 | 30091595 | intronic |  | . |  |
| rs2339467  | ALK | 2 | 29514593 | intronic |  | . |  |
| rs13424578 | ALK | 2 | 29477419 | intronic |  | . |  |
| rs11689426 | ALK | 2 | 29643332 | intronic |  | . |  |
| rs10779969 | ALK | 2 | 29671801 | intronic |  | . |  |
| rs2879482  | ALK | 2 | 30013096 | intronic |  | . |  |
| rs13391272 | ALK | 2 | 29670227 | intronic |  | . |  |
| rs11127225 | ALK | 2 | 29673607 | intronic |  | . |  |
| rs4074194  | ALK | 2 | 30071781 | intronic |  | . |  |
| rs1670286  | ALK | 2 | 29438333 | intronic |  | . |  |
| rs4493216  | ALK | 2 | 30142221 | intronic |  | . |  |



|            |     |   |          |          |  |   |  |
|------------|-----|---|----------|----------|--|---|--|
| rs11694370 | ALK | 2 | 29792102 | intronic |  | . |  |
| rs10177844 | ALK | 2 | 29872565 | intronic |  | . |  |
| rs4280416  | ALK | 2 | 30088023 | intronic |  | . |  |
| rs6547926  | ALK | 2 | 29660479 | intronic |  | . |  |
| rs7588341  | ALK | 2 | 29706271 | intronic |  | . |  |
| rs11897586 | ALK | 2 | 29542097 | intronic |  | . |  |
| rs1528426  | ALK | 2 | 29575049 | intronic |  | . |  |
| rs13411731 | ALK | 2 | 29721997 | intronic |  | . |  |
| rs2631979  | ALK | 2 | 29966213 | intronic |  | . |  |
| rs10210040 | ALK | 2 | 29732214 | intronic |  | . |  |
| rs2256776  | ALK | 2 | 29914852 | intronic |  | . |  |
| rs2631963  | ALK | 2 | 29923898 | intronic |  | . |  |
| rs4666232  | ALK | 2 | 29721821 | intronic |  | . |  |
| rs6733903  | ALK | 2 | 29805415 | intronic |  | . |  |
| rs4429434  | ALK | 2 | 30041479 | intronic |  | . |  |
| rs4665464  | ALK | 2 | 29733698 | intronic |  | . |  |
| rs4666177  | ALK | 2 | 29424089 | intronic |  | . |  |
| rs13398690 | ALK | 2 | 29869393 | intronic |  | . |  |
| rs2631971  | ALK | 2 | 29931699 | intronic |  | . |  |
| rs12105136 | ALK | 2 | 29785729 | intronic |  | . |  |
| rs2879504  | ALK | 2 | 29861246 | intronic |  | . |  |
| rs6742561  | ALK | 2 | 29793174 | intronic |  | . |  |
| rs7421625  | ALK | 2 | 29989451 | intronic |  | . |  |
| rs11127206 | ALK | 2 | 29431807 | intronic |  | . |  |
| rs1615183  | ALK | 2 | 29435447 | intronic |  | . |  |

|            |     |   |          |          |  |   |          |
|------------|-----|---|----------|----------|--|---|----------|
| rs4665457  | ALK | 2 | 29632572 | intronic |  | . |          |
| rs9309671  | ALK | 2 | 29838529 | intronic |  | . |          |
| rs11888731 | ALK | 2 | 29702883 | intronic |  | . |          |
| rs7603280  | ALK | 2 | 29565428 | intronic |  | . |          |
| rs13012046 | ALK | 2 | 30068116 | intronic |  | . |          |
| rs5007105  | ALK | 2 | 30033720 | intronic |  | . |          |
| rs2879503  | ALK | 2 | 29875226 | intronic |  | . |          |
| rs4567889  | ALK | 2 | 29739177 | intronic |  | . |          |
| rs13033797 | ALK | 2 | 29579812 | intronic |  | . |          |
| rs6708344  | ALK | 2 | 29535725 | intronic |  | . |          |
| rs2924371  | ALK | 2 | 29437509 | intronic |  | . |          |
| rs12986732 | ALK | 2 | 29586747 | intronic |  | . |          |
| rs2631985  | ALK | 2 | 29911170 | intronic |  | . |          |
| rs6724978  | ALK | 2 | 29588003 | intronic |  | . |          |
| rs6726799  | ALK | 2 | 29572680 | intronic |  | . |          |
| rs4519472  | ALK | 2 | 30041788 | intronic |  | . |          |
| rs7583871  | ALK | 2 | 29881235 | intronic |  | . |          |
| rs7592311  | ALK | 2 | 29501720 | intronic |  | . |          |
| rs12997218 | ALK | 2 | 30041065 | intronic |  | . |          |
| rs17007778 | ALK | 2 | 29500442 | intronic |  | . |          |
| rs6716687  | ALK | 2 | 29756031 | intronic |  | . |          |
| rs6734413  | ALK | 2 | 29726078 | intronic |  | . |          |
| rs6547973  | ALK | 2 | 29969390 | intronic |  | . |          |
| rs1569156  | ALK | 2 | 29444095 | exonic   |  |   | stopgain |
| rs13399652 | ALK | 2 | 29873085 | intronic |  | . |          |

|            |      |   |          |          |         |         |            |
|------------|------|---|----------|----------|---------|---------|------------|
| rs12105526 | ALK  | 2 | 30029875 | intronic |         | .       |            |
| rs17008653 | ALK  | 2 | 29991076 | intronic |         | .       |            |
| rs6750566  | ALK  | 2 | 29621756 | intronic |         | .       |            |
| rs11690456 | ALK  | 2 | 29625029 | intronic |         | .       |            |
| rs6547947  | ALK  | 2 | 29781000 | intronic |         | .       |            |
| rs12998728 | ALK  | 2 | 29474502 | intronic |         | .       |            |
| rs11892780 | ALK  | 2 | 29418844 | intronic |         | .       |            |
| rs4473347  | ALK  | 2 | 30074893 | intronic |         | .       |            |
| rs6745718  | ALK  | 2 | 29758466 | intronic |         | .       |            |
| rs17783362 | ALK  | 2 | 29487744 | intronic |         | .       |            |
| rs2293348  | EGFR | 7 | 55266757 | intronic |         | .       |            |
| rs1107616  | EGFR | 7 | 55280152 | intronic |         | .       |            |
| rs12535328 | EGFR | 7 | 55291726 | intronic |         | .       |            |
| rs7803660  | EGFR | 7 | 55174071 | intronic |         | .       |            |
| rs2293347  | EGFR | 7 | 55268916 | exonic   | GAA-GAG | Glu-Glu | synonymous |
| rs12718947 | EGFR | 7 | 55292321 | intronic |         | .       |            |
| rs6960438  | EGFR | 7 | 55141908 | intronic |         | .       |            |
| rs940806   | EGFR | 7 | 55279745 | intronic |         | .       |            |
| rs17518446 | EGFR | 7 | 55262967 | intronic |         | .       |            |
| rs41324647 | EGFR | 7 | 55291353 | intronic |         | .       |            |
| rs4140770  | EGFR | 7 | 55141476 | intronic |         | .       |            |
| rs17172461 | EGFR | 7 | 55304166 | intronic |         | .       |            |
| rs6947594  | EGFR | 7 | 55203297 | intronic |         | .       |            |
| rs763317   | EGFR | 7 | 55095197 | intronic |         | .       |            |
| rs2877260  | EGFR | 7 | 55171629 | intronic |         | .       |            |

|            |      |   |          |          |  |   |  |
|------------|------|---|----------|----------|--|---|--|
| rs2110290  | EGFR | 7 | 55172768 | intronic |  | . |  |
| rs10488142 | EGFR | 7 | 55195947 | intronic |  | . |  |
| rs2075109  | EGFR | 7 | 55218903 | intronic |  | . |  |
| rs2075110  | EGFR | 7 | 55219159 | intronic |  | . |  |
| rs11506105 | EGFR | 7 | 55220177 | intronic |  | . |  |
| rs7785313  | EGFR | 7 | 55113095 | intronic |  | . |  |
| rs12666347 | EGFR | 7 | 55205930 | intronic |  | . |  |
| rs17746482 | EGFR | 7 | 55309247 | intronic |  | . |  |
| rs10244108 | EGFR | 7 | 55152337 | intronic |  | . |  |
| rs12538489 | EGFR | 7 | 55099836 | intronic |  | . |  |
| rs12671550 | EGFR | 7 | 55173675 | intronic |  | . |  |
| rs4947984  | EGFR | 7 | 55211316 | intronic |  | . |  |
| rs11536635 | EGFR | 7 | 55229015 | intronic |  | . |  |
| rs729969   | EGFR | 7 | 55128207 | intronic |  | . |  |
| rs7789965  | EGFR | 7 | 55113748 | intronic |  | . |  |
| rs883117   | EGFR | 7 | 55307545 | intronic |  | . |  |
| rs1534130  | EGFR | 7 | 55309732 | intronic |  | . |  |
| rs17586344 | EGFR | 7 | 55140398 | intronic |  | . |  |
| rs7796139  | EGFR | 7 | 55175876 | intronic |  | . |  |
| rs35891645 | EGFR | 7 | 55324148 | UTR3     |  | . |  |
| rs7783970  | EGFR | 7 | 55290368 | intronic |  | . |  |
| rs17172432 | EGFR | 7 | 55141317 | intronic |  | . |  |
| rs13244925 | EGFR | 7 | 55192256 | intronic |  | . |  |
| rs35699152 | EGFR | 7 | 55323837 | intronic |  | . |  |
| rs17172446 | EGFR | 7 | 55202598 | intronic |  | . |  |

|            |      |   |          |          |   |
|------------|------|---|----------|----------|---|
| rs759167   | EGFR | 7 | 55127784 | intronic | . |
| rs980653   | EGFR | 7 | 55185890 | intronic | . |
| rs12718939 | EGFR | 7 | 55105320 | intronic | . |
| rs759169   | EGFR | 7 | 55154636 | intronic | . |
| rs17746476 | EGFR | 7 | 55307926 | intronic | . |
| rs10269512 | EGFR | 7 | 55267160 | intronic | . |
| rs6970262  | EGFR | 7 | 55259763 | intronic | . |
| rs7785013  | EGFR | 7 | 55152667 | intronic | . |
| rs17586365 | EGFR | 7 | 55140786 | intronic | . |
| rs10488140 | EGFR | 7 | 55138388 | intronic | . |
| rs11768038 | EGFR | 7 | 55291136 | intronic | . |
| rs3735061  | EGFR | 7 | 55163867 | intronic | . |
| rs1997083  | EGFR | 7 | 55292626 | intronic | . |
| rs2241055  | EGFR | 7 | 55240461 | intronic | . |
| rs12534147 | EGFR | 7 | 55291079 | intronic | . |
| rs17172438 | EGFR | 7 | 55151537 | intronic | . |
| rs7781264  | EGFR | 7 | 55230840 | intronic | . |
| rs11238349 | EGFR | 7 | 55156071 | intronic | . |
| rs17172457 | EGFR | 7 | 55300905 | intronic | . |
| rs2740764  | EGFR | 7 | 55267458 | intronic | . |
| rs11767730 | EGFR | 7 | 55313378 | intronic | . |
| rs845552   | EGFR | 7 | 55245507 | intronic | . |
| rs759166   | EGFR | 7 | 55126998 | intronic | . |
| rs6978771  | EGFR | 7 | 55140296 | intronic | . |
| rs7801956  | EGFR | 7 | 55214443 | intronic | . |

|            |      |   |          |          |         |         |            |
|------------|------|---|----------|----------|---------|---------|------------|
| rs11487218 | EGFR | 7 | 55141540 | intronic |         | .       |            |
| rs1558544  | EGFR | 7 | 55228053 | intronic |         | .       |            |
| rs9642391  | EGFR | 7 | 55245364 | intronic |         | .       |            |
| rs11975042 | EGFR | 7 | 55309690 | intronic |         | .       |            |
| rs10280515 | EGFR | 7 | 55173700 | intronic |         | .       |            |
| rs10251695 | EGFR | 7 | 55218749 | intronic |         | .       |            |
| rs7786831  | EGFR | 7 | 55190489 | intronic |         | .       |            |
| rs10247160 | EGFR | 7 | 55164994 | intronic |         | .       |            |
| rs868254   | EGFR | 7 | 55302832 | intronic |         | .       |            |
| rs17172466 | EGFR | 7 | 55306332 | intronic |         | .       |            |
| rs759170   | EGFR | 7 | 55155372 | intronic |         | .       |            |
| rs7804688  | EGFR | 7 | 55190098 | intronic |         | .       |            |
| rs11976696 | EGFR | 7 | 55232333 | intronic |         | .       |            |
| rs2041647  | EGFR | 7 | 55183115 | intronic |         | .       |            |
| rs2072454  | EGFR | 7 | 55214348 | exonic   | AAC-AAT | Asn-Asn | synonymous |
| rs7810035  | EGFR | 7 | 55316229 | intronic |         | .       |            |
| rs10277413 | EGFR | 7 | 55238464 | UTR3     |         | .       |            |
| rs883118   | EGFR | 7 | 55307104 | intronic |         | .       |            |
| rs7809028  | EGFR | 7 | 55280677 | intronic |         | .       |            |
| rs6972381  | EGFR | 7 | 55257413 | intronic |         | .       |            |
| rs1107617  | EGFR | 7 | 55280268 | intronic |         | .       |            |
| rs7781062  | EGFR | 7 | 55182494 | intronic |         | .       |            |
| rs3735063  | EGFR | 7 | 55153164 | intronic |         | .       |            |
| rs4947986  | EGFR | 7 | 55221655 | intronic |         | .       |            |
| rs11974707 | EGFR | 7 | 55108717 | intronic |         | .       |            |

|            |      |   |          |          |  |   |  |
|------------|------|---|----------|----------|--|---|--|
| rs12668421 | EGFR | 7 | 55109177 | intronic |  | . |  |
| rs7809332  | EGFR | 7 | 55293361 | intronic |  | . |  |
| rs1525643  | EGFR | 7 | 55302440 | intronic |  | . |  |
| rs7784002  | EGFR | 7 | 55107469 | intronic |  | . |  |
| rs11977660 | EGFR | 7 | 55162336 | intronic |  | . |  |
| rs7803520  | EGFR | 7 | 55204108 | intronic |  | . |  |
| rs759162   | EGFR | 7 | 55228173 | intronic |  | . |  |
| rs3823585  | EGFR | 7 | 55163737 | intronic |  | . |  |
| rs12535226 | EGFR | 7 | 55156419 | intronic |  | . |  |
| rs10229932 | EGFR | 7 | 55190672 | intronic |  | . |  |
| rs6948867  | EGFR | 7 | 55323098 | intronic |  | . |  |
| rs17172433 | EGFR | 7 | 55142435 | intronic |  | . |  |
| rs6954351  | EGFR | 7 | 55171190 | intronic |  | . |  |
| rs2037699  | EGFR | 7 | 55306612 | intronic |  | . |  |
| rs4947963  | EGFR | 7 | 55088415 | intronic |  | . |  |
| rs11976065 | EGFR | 7 | 55107196 | intronic |  | . |  |
| rs4947488  | EGFR | 7 | 55116555 | intronic |  | . |  |
| rs10234806 | EGFR | 7 | 55132080 | intronic |  | . |  |
| rs917880   | EGFR | 7 | 55162011 | intronic |  | . |  |
| rs917881   | EGFR | 7 | 55162305 | intronic |  | . |  |
| rs10488143 | EGFR | 7 | 55215909 | intronic |  | . |  |
| rs6593211  | EGFR | 7 | 55277964 | UTR3     |  | . |  |
| rs2037698  | EGFR | 7 | 55306625 | intronic |  | . |  |
| rs11770506 | EGFR | 7 | 55090379 | intronic |  | . |  |
| rs13234622 | EGFR | 7 | 55211879 | intronic |  | . |  |

|            |       |   |           |          |         |         |                       |
|------------|-------|---|-----------|----------|---------|---------|-----------------------|
| rs11760524 | EGFR  | 7 | 55221167  | intronic |         | .       |                       |
| rs7800937  | EphA1 | 7 | 143093307 | intronic |         | .       |                       |
| rs3885667  | EphA1 | 7 | 143103155 | intronic |         | .       |                       |
| rs10227035 | EphA1 | 7 | 143089295 | intronic |         | .       |                       |
| rs6967117  | EphA1 | 7 | 143088867 | exonic   | TCC-CCC | Ser-Pro | nc transcript variant |
| rs4283960  | EphA1 | 7 | 143103380 | intronic |         | .       |                       |
| rs11768549 | EphA1 | 7 | 143095153 | exonic   |         | Pro-Leu | nc transcript variant |
| rs4421280  | EphA1 | 7 | 143103217 | intronic |         | .       |                       |
| rs4425279  | EphA3 | 3 | 89334847  | intronic |         | .       |                       |
| rs9859735  | EphA3 | 3 | 89186377  | intronic |         | .       |                       |
| rs7612746  | EphA3 | 3 | 89249262  | intronic |         | .       |                       |
| rs870900   | EphA3 | 3 | 89417287  | intronic |         | .       |                       |
| rs7644070  | EphA3 | 3 | 89370107  | intronic |         | .       |                       |
| rs17026944 | EphA3 | 3 | 89521131  | intronic |         | .       |                       |
| rs6551412  | EphA3 | 3 | 89496502  | intronic |         | .       |                       |
| rs7646842  | EphA3 | 3 | 89249284  | intronic |         | .       |                       |
| rs9817553  | EphA3 | 3 | 89384566  | intronic |         | .       |                       |
| rs11920519 | EphA3 | 3 | 89306245  | intronic |         | .       |                       |
| rs7629132  | EphA3 | 3 | 89307462  | intronic |         | .       |                       |
| rs1912965  | EphA3 | 3 | 89518332  | intronic |         | .       |                       |
| rs7642606  | EphA3 | 3 | 89168883  | intronic |         | .       |                       |
| rs17026915 | EphA3 | 3 | 89458612  | intronic |         | .       |                       |
| rs17800551 | EphA3 | 3 | 89317315  | intronic |         | .       |                       |
| rs994129   | EphA3 | 3 | 89318462  | intronic |         | .       |                       |
| rs9866618  | EphA3 | 3 | 89319577  | intronic |         | .       |                       |



|            |       |   |          |          |         |         |          |
|------------|-------|---|----------|----------|---------|---------|----------|
| rs1512909  | EphA3 | 3 | 89336417 | intronic |         | .       |          |
| rs17801309 | EphA3 | 3 | 89521664 | exonic   | CGC-CAC | Arg-His | missence |
| rs6551405  | EphA3 | 3 | 89248023 | intronic |         |         |          |
| rs9861649  | EphA3 | 3 | 89236041 | intronic |         | .       |          |
| rs9310117  | EphA3 | 3 | 89275906 | intronic |         | .       |          |
| rs13101118 | EphA3 | 3 | 89243942 | intronic |         | .       |          |
| rs1015126  | EphA3 | 3 | 89364451 | intronic |         | .       |          |
| rs13097212 | EphA3 | 3 | 89230610 | intronic |         | .       |          |
| rs17026938 | EphA3 | 3 | 89505858 | intronic |         | .       |          |
| rs9828822  | EphA3 | 3 | 89213912 | intronic |         | .       |          |
| rs9868686  | EphA3 | 3 | 89211284 | intronic |         | .       |          |
| rs907713   | EphA3 | 3 | 89326479 | intronic |         | .       |          |
| rs870899   | EphA3 | 3 | 89417171 | intronic |         | .       |          |
| rs2137486  | EphA3 | 3 | 89362129 | intronic |         | .       |          |
| rs6551409  | EphA3 | 3 | 89302171 | intronic |         | .       |          |
| rs4449340  | EphA3 | 3 | 89323876 | intronic |         | .       |          |
| rs6797260  | EphA3 | 3 | 89302486 | intronic |         | .       |          |
| rs9817310  | EphA3 | 3 | 89280754 | intronic |         | .       |          |
| rs11720651 | EphA3 | 3 | 89261061 | intronic |         | .       |          |
| rs1912966  | EphA3 | 3 | 89518464 | intronic |         | .       |          |
| rs12486528 | EphA3 | 3 | 89338394 | intronic |         | .       |          |
| rs9811026  | EphA3 | 3 | 89174152 | intronic |         | .       |          |
| rs7373232  | EphA3 | 3 | 89268266 | intronic |         | .       |          |
| rs1040017  | EphA3 | 3 | 89329632 | intronic |         | .       |          |
| rs7647240  | EphA3 | 3 | 89243497 | intronic |         | .       |          |

|            |       |   |          |          |         |         |          |
|------------|-------|---|----------|----------|---------|---------|----------|
| rs17738248 | EphA3 | 3 | 89296363 | intronic |         | .       |          |
| rs7428598  | EphA3 | 3 | 89187123 | intronic |         | .       |          |
| rs6551407  | EphA3 | 3 | 89270605 | intronic |         | .       |          |
| rs13097740 | EphA3 | 3 | 89313541 | intronic |         | .       |          |
| rs11128072 | EphA3 | 3 | 89317917 | intronic |         | .       |          |
| rs1028013  | EphA3 | 3 | 89484268 | intronic |         | .       |          |
| rs1567732  | EphA3 | 3 | 89315893 | intronic |         | .       |          |
| rs6771054  | EphA3 | 3 | 89489529 | intronic |         | .       |          |
| rs6796339  | EphA3 | 3 | 89286159 | intronic |         | .       |          |
| rs9310119  | EphA3 | 3 | 89378042 | intronic |         | .       |          |
| rs6551408  | EphA3 | 3 | 89270738 | intronic |         | .       |          |
| rs9868782  | EphA3 | 3 | 89384121 | intronic |         | .       |          |
| rs9836340  | EphA3 | 3 | 89405754 | intronic |         | .       |          |
| rs11927218 | EphA3 | 3 | 89329525 | intronic |         | .       |          |
| rs7611735  | EphA3 | 3 | 89186994 | intronic |         | .       |          |
| rs6767230  | EphA3 | 3 | 89267181 | intronic |         | .       |          |
| rs6779710  | EphA3 | 3 | 89267150 | intronic |         | .       |          |
| rs9842599  | EphA3 | 3 | 89407256 | intronic |         | .       |          |
| rs7619025  | EphA3 | 3 | 89368629 | intronic |         | .       |          |
| rs35124509 | EphA3 | 3 | 89521693 | exonic   | TGG-CGG | Trp-Arg | missense |
| rs7615949  | EphA3 | 3 | 89432683 | intronic |         | .       |          |
| rs11920405 | EphA3 | 3 | 89260274 | intronic |         | .       |          |
| rs6801565  | EphA3 | 3 | 89270519 | intronic |         | .       |          |
| rs11128068 | EphA3 | 3 | 89207222 | intronic |         | .       |          |
| rs7633500  | EphA3 | 3 | 89497082 | intronic |         | .       |          |

|            |       |   |          |          |  |   |  |
|------------|-------|---|----------|----------|--|---|--|
| rs17082122 | EphA5 | 4 | 66280946 | intronic |  | . |  |
| rs11728612 | EphA5 | 4 | 66442069 | intronic |  | . |  |
| rs9991256  | EphA5 | 4 | 66327854 | intronic |  | . |  |
| rs6852766  | EphA5 | 4 | 66333690 | intronic |  | . |  |
| rs2084682  | EphA5 | 4 | 66262049 | intronic |  | . |  |
| rs7667410  | EphA5 | 4 | 66486986 | intronic |  | . |  |
| rs17086144 | EphA5 | 4 | 66242049 | intronic |  | . |  |
| rs4438803  | EphA5 | 4 | 66507443 | intronic |  | . |  |
| rs6829925  | EphA5 | 4 | 66343044 | intronic |  | . |  |
| rs7660334  | EphA5 | 4 | 66341463 | intronic |  | . |  |
| rs1376417  | EphA5 | 4 | 66234569 | intronic |  | . |  |
| rs6847413  | EphA5 | 4 | 66268658 | intronic |  | . |  |
| rs11737314 | EphA5 | 4 | 66364374 | intronic |  | . |  |
| rs4370201  | EphA5 | 4 | 66500571 | intronic |  | . |  |
| rs10006892 | EphA5 | 4 | 66308481 | intronic |  | . |  |
| rs4320185  | EphA5 | 4 | 66384235 | intronic |  | . |  |
| rs6844942  | EphA5 | 4 | 66412192 | intronic |  | . |  |
| rs1376416  | EphA5 | 4 | 66258273 | intronic |  | . |  |
| rs17086185 | EphA5 | 4 | 66267428 | intronic |  | . |  |
| rs4860666  | EphA5 | 4 | 66333933 | intronic |  | . |  |
| rs6815080  | EphA5 | 4 | 66362487 | intronic |  | . |  |
| rs6834811  | EphA5 | 4 | 66452949 | intronic |  | . |  |
| rs4487412  | EphA5 | 4 | 66484354 | intronic |  | . |  |
| rs4365778  | EphA5 | 4 | 66364587 | intronic |  | . |  |
| rs4371663  | EphA5 | 4 | 66290312 | intronic |  | . |  |

|            |       |   |          |          |  |   |  |
|------------|-------|---|----------|----------|--|---|--|
| rs11131612 | EphA5 | 4 | 66525024 | intronic |  | . |  |
| rs4860182  | EphA5 | 4 | 66292080 | intronic |  | . |  |
| rs10025570 | EphA5 | 4 | 66249102 | intronic |  | . |  |
| rs4320186  | EphA5 | 4 | 66483593 | intronic |  | . |  |
| rs4860662  | EphA5 | 4 | 66283816 | intronic |  | . |  |
| rs4289492  | EphA5 | 4 | 66289745 | intronic |  | . |  |
| rs5001097  | EphA5 | 4 | 66334714 | intronic |  | . |  |
| rs7673091  | EphA5 | 4 | 66382111 | intronic |  | . |  |
| rs4860651  | EphA5 | 4 | 66188295 | UTR3     |  | . |  |
| rs7658065  | EphA5 | 4 | 66265670 | intronic |  | . |  |
| rs4599467  | EphA5 | 4 | 66442750 | intronic |  | . |  |
| rs4860663  | EphA5 | 4 | 66297574 | intronic |  | . |  |
| rs4611975  | EphA5 | 4 | 66500248 | intronic |  | . |  |
| rs6823779  | EphA5 | 4 | 66281005 | intronic |  | . |  |
| rs10006666 | EphA5 | 4 | 66308209 | intronic |  | . |  |
| rs12644315 | EphA5 | 4 | 66420825 | intronic |  | . |  |
| rs11938753 | EphA5 | 4 | 66197269 | UTR3     |  | . |  |
| rs1349453  | EphA5 | 4 | 66263653 | intronic |  | . |  |
| rs4267782  | EphA5 | 4 | 66335098 | intronic |  | . |  |
| rs9784550  | EphA5 | 4 | 66528411 | intronic |  | . |  |
| rs7697278  | EphA5 | 4 | 66243126 | intronic |  | . |  |
| rs17086224 | EphA5 | 4 | 66282361 | intronic |  | . |  |
| rs2198103  | EphA5 | 4 | 66272179 | intronic |  | . |  |
| rs4608860  | EphA5 | 4 | 66514008 | intronic |  | . |  |
| rs7684022  | EphA5 | 4 | 66389701 | intronic |  | . |  |

|            |       |   |          |          |  |   |  |
|------------|-------|---|----------|----------|--|---|--|
| rs4508946  | EphA5 | 4 | 66192715 | intronic |  | . |  |
| rs17086125 | EphA5 | 4 | 66236191 | intronic |  | . |  |
| rs4604104  | EphA5 | 4 | 66384360 | intronic |  | . |  |
| rs1451170  | EphA5 | 4 | 66283184 | intronic |  | . |  |
| rs12509018 | EphA5 | 4 | 66278087 | intronic |  | . |  |
| rs9312144  | EphA5 | 4 | 66265727 | intronic |  | . |  |
| rs10517937 | EphA5 | 4 | 66267320 | intronic |  | . |  |
| rs896215   | EphA5 | 4 | 66270913 | intronic |  | . |  |
| rs9986026  | EphA5 | 4 | 66292262 | intronic |  | . |  |
| rs4374661  | EphA5 | 4 | 66291257 | intronic |  | . |  |
| rs4860679  | EphA5 | 4 | 66401110 | intronic |  | . |  |
| rs1376412  | EphA5 | 4 | 66267015 | intronic |  | . |  |
| rs17086181 | EphA5 | 4 | 66267300 | intronic |  | . |  |
| rs10008930 | EphA5 | 4 | 66342070 | intronic |  | . |  |
| rs3752774  | EphA5 | 4 | 66201634 | intronic |  | . |  |
| rs6840093  | EphA5 | 4 | 66366103 | intronic |  | . |  |
| rs6551926  | EphA5 | 4 | 66292123 | intronic |  | . |  |
| rs7659227  | EphA5 | 4 | 66496170 | intronic |  | . |  |
| rs4860671  | EphA5 | 4 | 66367589 | intronic |  | . |  |
| rs6551932  | EphA5 | 4 | 66399839 | intronic |  | . |  |
| rs4422467  | EphA5 | 4 | 66494645 | intronic |  | . |  |
| rs11947629 | EphA5 | 4 | 66197329 | UTR3     |  | . |  |
| rs4541571  | EphA5 | 4 | 66378192 | intronic |  | . |  |
| rs5027823  | EphA5 | 4 | 66487084 | intronic |  | . |  |
| rs4132314  | EphA5 | 4 | 66381628 | intronic |  | . |  |

|            |       |   |          |          |  |   |  |
|------------|-------|---|----------|----------|--|---|--|
| rs6849874  | EphA5 | 4 | 66280731 | intronic |  | . |  |
| rs13139257 | EphA5 | 4 | 66337853 | intronic |  | . |  |
| rs11931601 | EphA5 | 4 | 66431909 | intronic |  | . |  |
| rs4860652  | EphA5 | 4 | 66196635 | UTR3     |  | . |  |
| rs12642347 | EphA5 | 4 | 66431605 | intronic |  | . |  |
| rs6850093  | EphA5 | 4 | 66443198 | intronic |  | . |  |
| rs13123581 | EphA5 | 4 | 66215872 | intronic |  | . |  |
| rs4349648  | EphA5 | 4 | 66289006 | intronic |  | . |  |
| rs4613617  | EphA5 | 4 | 66440622 | intronic |  | . |  |
| rs10002887 | EphA5 | 4 | 66256159 | intronic |  | . |  |
| rs9997603  | EphA5 | 4 | 66438114 | intronic |  | . |  |
| rs12498502 | EphA5 | 4 | 66328051 | intronic |  | . |  |
| rs17086139 | EphA5 | 4 | 66239035 | intronic |  | . |  |
| rs7688941  | EphA5 | 4 | 66196622 | UTR3     |  | . |  |
| rs6855605  | EphA5 | 4 | 66456092 | intronic |  | . |  |
| rs11943721 | EphA5 | 4 | 66282405 | intronic |  | . |  |
| rs2084681  | EphA5 | 4 | 66261976 | intronic |  | . |  |
| rs4566705  | EphA5 | 4 | 66521229 | intronic |  | . |  |
| rs13124187 | EphA5 | 4 | 66208911 | intronic |  | . |  |
| rs10022719 | EphA5 | 4 | 66356885 | intronic |  | . |  |
| rs4132313  | EphA5 | 4 | 66381581 | intronic |  | . |  |
| rs4518304  | EphA5 | 4 | 66421666 | intronic |  | . |  |
| rs17086208 | EphA5 | 4 | 66277342 | intronic |  | . |  |
| rs13122571 | EphA5 | 4 | 66346556 | intronic |  | . |  |
| rs10030643 | EphA5 | 4 | 66268421 | intronic |  | . |  |

|            |       |   |          |          |  |   |  |
|------------|-------|---|----------|----------|--|---|--|
| rs12502991 | EphA5 | 4 | 66295548 | intronic |  | . |  |
| rs9992203  | EphA5 | 4 | 66227800 | intronic |  | . |  |
| rs11947238 | EphA5 | 4 | 66284091 | intronic |  | . |  |
| rs12504386 | EphA5 | 4 | 66380863 | intronic |  | . |  |
| rs13137977 | EphA5 | 4 | 66380539 | intronic |  | . |  |
| rs6844228  | EphA5 | 4 | 66377633 | intronic |  | . |  |
| rs7688795  | EphA5 | 4 | 66189260 | UTR3     |  | . |  |
| rs1868847  | EphA5 | 4 | 66190432 | intronic |  | . |  |
| rs1451178  | EphA5 | 4 | 66219859 | intronic |  | . |  |
| rs7668692  | EphA5 | 4 | 66251050 | intronic |  | . |  |
| rs2084680  | EphA5 | 4 | 66264699 | intronic |  | . |  |
| rs10010284 | EphA5 | 4 | 66376366 | intronic |  | . |  |
| rs11934861 | EphA5 | 4 | 66340446 | intronic |  | . |  |
| rs4475196  | EphA5 | 4 | 66483863 | intronic |  | . |  |
| rs6851852  | EphA5 | 4 | 66208079 | intronic |  | . |  |
| rs4565127  | EphA5 | 4 | 66526101 | intronic |  | . |  |
| rs7656497  | EphA5 | 4 | 66210664 | intronic |  | . |  |
| rs2218847  | EphA5 | 4 | 66275695 | intronic |  | . |  |
| rs13120093 | EphA5 | 4 | 66272411 | intronic |  | . |  |
| rs7690645  | EphA5 | 4 | 66242661 | intronic |  | . |  |
| rs2290254  | EphA5 | 4 | 66214043 | intronic |  | . |  |
| rs12506403 | EphA5 | 4 | 66453438 | intronic |  | . |  |
| rs12054588 | EphA5 | 4 | 66447771 | intronic |  | . |  |
| rs7664993  | EphA5 | 4 | 66333341 | intronic |  | . |  |
| rs4241663  | EphA5 | 4 | 66291445 | intronic |  | . |  |

|            |       |   |          |          |  |   |  |
|------------|-------|---|----------|----------|--|---|--|
| rs10866158 | EphA5 | 4 | 66288667 | intronic |  | . |  |
| rs6826193  | EphA5 | 4 | 66427044 | intronic |  | . |  |
| rs7659865  | EphA5 | 4 | 66292306 | intronic |  | . |  |
| rs2582036  | EphB2 | 1 | 23128940 | intronic |  | . |  |
| rs6695566  | EphB2 | 1 | 23042127 | intronic |  | . |  |
| rs893961   | EphB2 | 1 | 23118173 | intronic |  | . |  |
| rs10917280 | EphB2 | 1 | 23044181 | intronic |  | . |  |
| rs4655102  | EphB2 | 1 | 23082136 | intronic |  | . |  |
| rs16827476 | EphB2 | 1 | 23053536 | intronic |  | . |  |
| rs16827699 | EphB2 | 1 | 23200129 | intronic |  | . |  |
| rs16827555 | EphB2 | 1 | 23122540 | intronic |  | . |  |
| rs309543   | EphB2 | 1 | 23225322 | intronic |  | . |  |
| rs4655099  | EphB2 | 1 | 23081927 | intronic |  | . |  |
| rs7554093  | EphB2 | 1 | 23199402 | intronic |  | . |  |
| rs2869513  | EphB2 | 1 | 23045943 | intronic |  | . |  |
| rs1561624  | EphB2 | 1 | 23101688 | UTR5     |  | . |  |
| rs2582021  | EphB2 | 1 | 23089261 | intronic |  | . |  |
| rs2765854  | EphB2 | 1 | 23217804 | intronic |  | . |  |
| rs10753541 | EphB2 | 1 | 23061992 | intronic |  | . |  |
| rs16827678 | EphB2 | 1 | 23185449 | intronic |  | . |  |
| rs4361967  | EphB2 | 1 | 23148336 | intronic |  | . |  |
| rs7519206  | EphB2 | 1 | 23174591 | intronic |  | . |  |
| rs4655136  | EphB2 | 1 | 23199949 | intronic |  | . |  |
| rs12076863 | EphB2 | 1 | 23113910 | intronic |  | . |  |
| rs6686970  | EphB2 | 1 | 23073622 | intronic |  | . |  |



|            |       |   |          |          |  |   |  |
|------------|-------|---|----------|----------|--|---|--|
| rs4263970  | EphB2 | 1 | 23063930 | intronic |  | . |  |
| rs751023   | EphB2 | 1 | 23143778 | intronic |  | . |  |
| rs10917288 | EphB2 | 1 | 23071845 | intronic |  | . |  |
| rs7516175  | EphB2 | 1 | 23096818 | intronic |  | . |  |
| rs16827672 | EphB2 | 1 | 23182684 | intronic |  | . |  |
| rs6698922  | EphB2 | 1 | 23073167 | intronic |  | . |  |
| rs7536195  | EphB2 | 1 | 23142496 | intronic |  | . |  |
| rs6687094  | EphB2 | 1 | 23156289 | intronic |  | . |  |
| rs12061624 | EphB2 | 1 | 23174163 | intronic |  | . |  |
| rs4654825  | EphB2 | 1 | 23199726 | intronic |  | . |  |
| rs309473   | EphB2 | 1 | 23218714 | intronic |  | . |  |
| rs1866792  | EphB2 | 1 | 23123331 | intronic |  | . |  |
| rs170129   | EphB2 | 1 | 23209562 | intronic |  | . |  |
| rs10917279 | EphB2 | 1 | 23038732 | intronic |  | . |  |
| rs16827697 | EphB2 | 1 | 23199311 | intronic |  | . |  |
| rs16827484 | EphB2 | 1 | 23065120 | intronic |  | . |  |
| rs309499   | EphB2 | 1 | 23234946 | intronic |  | . |  |
| rs12090415 | EphB2 | 1 | 23155231 | intronic |  | . |  |
| rs4506436  | EphB2 | 1 | 23127876 | intronic |  | . |  |
| rs309471   | EphB2 | 1 | 23220026 | intronic |  | . |  |
| rs6703896  | EphB2 | 1 | 23189059 | intronic |  | . |  |
| rs12239985 | EphB2 | 1 | 23204183 | intronic |  | . |  |
| rs2295022  | EphB2 | 1 | 23241601 | UTR3     |  | . |  |
| rs10442639 | EphB2 | 1 | 23061365 | intronic |  | . |  |
| rs10917307 | EphB2 | 1 | 23147541 | intronic |  | . |  |

|            |       |   |          |          |  |   |  |
|------------|-------|---|----------|----------|--|---|--|
| rs2817901  | EphB2 | 1 | 23109291 | intronic |  | . |  |
| rs10157808 | EphB2 | 1 | 23076916 | intronic |  | . |  |
| rs2675495  | EphB2 | 1 | 23226074 | intronic |  | . |  |
| rs10917325 | EphB2 | 1 | 23209278 | intronic |  | . |  |
| rs4589082  | EphB2 | 1 | 23147403 | intronic |  | . |  |
| rs10799762 | EphB2 | 1 | 23112369 | intronic |  | . |  |
| rs12724658 | EphB2 | 1 | 23115749 | intronic |  | . |  |
| rs2138542  | EphB2 | 1 | 23197525 | intronic |  | . |  |
| rs2817890  | EphB2 | 1 | 23237825 | intronic |  | . |  |
| rs12566963 | EphB2 | 1 | 23060250 | intronic |  | . |  |
| rs12723359 | EphB2 | 1 | 23137761 | intronic |  | . |  |
| rs882025   | EphB2 | 1 | 23050352 | intronic |  | . |  |
| rs2765849  | EphB2 | 1 | 23215595 | intronic |  | . |  |
| rs4654819  | EphB2 | 1 | 23148919 | intronic |  | . |  |
| rs6687487  | EphB2 | 1 | 23061551 | intronic |  | . |  |
| rs4655134  | EphB2 | 1 | 23198619 | intronic |  | . |  |
| rs6667289  | EphB2 | 1 | 23175151 | intronic |  | . |  |
| rs10753546 | EphB2 | 1 | 23184264 | intronic |  | . |  |
| rs12404289 | EphB2 | 1 | 23168961 | intronic |  | . |  |
| rs6667416  | EphB2 | 1 | 23145239 | intronic |  | . |  |
| rs893960   | EphB2 | 1 | 23044223 | intronic |  | . |  |
| rs309495   | EphB2 | 1 | 23238023 | intronic |  | . |  |
| rs4655129  | EphB2 | 1 | 23169528 | intronic |  | . |  |
| rs11801544 | EphB2 | 1 | 23115939 | intronic |  | . |  |
| rs10799764 | EphB2 | 1 | 23117460 | intronic |  | . |  |

|            |       |   |          |          |   |
|------------|-------|---|----------|----------|---|
| rs10917282 | EphB2 | 1 | 23048063 | intronic | . |
| rs6701399  | EphB2 | 1 | 23152988 | intronic | . |
| rs2817893  | EphB2 | 1 | 23197913 | intronic | . |
| rs7340102  | EphB2 | 1 | 23229177 | intronic | . |
| rs10917284 | EphB2 | 1 | 23062908 | intronic | . |
| rs16827646 | EphB2 | 1 | 23164756 | intronic | . |
| rs4147362  | EphB2 | 1 | 23200159 | intronic | . |
| rs4655130  | EphB2 | 1 | 23175994 | intronic | . |
| rs10158095 | EphB2 | 1 | 23207352 | intronic | . |
| rs4427376  | EphB2 | 1 | 23176740 | intronic | . |
| rs4654814  | EphB2 | 1 | 23094421 | intronic | . |
| rs12143574 | EphB2 | 1 | 23142716 | intronic | . |
| rs10753545 | EphB2 | 1 | 23158122 | intronic | . |
| rs4655117  | EphB2 | 1 | 23137631 | intronic | . |
| rs893964   | EphB2 | 1 | 23086096 | intronic | . |
| rs4655128  | EphB2 | 1 | 23169503 | intronic | . |
| rs3122405  | EphB2 | 1 | 23092066 | intronic | . |
| rs309476   | EphB2 | 1 | 23212740 | intronic | . |
| rs7413155  | EphB2 | 1 | 23184206 | intronic | . |
| rs10799771 | EphB2 | 1 | 23206684 | intronic | . |
| rs10799772 | EphB2 | 1 | 23229640 | intronic | . |
| rs2165332  | EphB2 | 1 | 23142351 | intronic | . |
| rs6658894  | EphB2 | 1 | 23175356 | intronic | . |
| rs7530478  | EphB2 | 1 | 23128716 | intronic | . |
| rs2817907  | EphB2 | 1 | 23106474 | intronic | . |

|            |       |    |           |          |         |         |            |
|------------|-------|----|-----------|----------|---------|---------|------------|
| rs17488885 | EphB2 | 1  | 23176759  | intronic |         | .       |            |
| rs10799766 | EphB2 | 1  | 23151876  | intronic |         | .       |            |
| rs1138510  | EphB3 | 3  | 184299167 | exonic   | TCC-TCT | Ser-Ser | synonymous |
| rs7652597  | EphB3 | 3  | 184293769 | exonic   | TCC-TCT | Ser-Ser | synonymous |
| rs1078806  | FGFR2 | 10 | 123338975 | intronic |         | .       |            |
| rs11200000 | FGFR2 | 10 | 123311510 | intronic |         | .       |            |
| rs2981456  | FGFR2 | 10 | 123272009 | intronic |         | .       |            |
| rs3135715  | FGFR2 | 10 | 123354726 | intronic |         | .       |            |
| rs2912753  | FGFR2 | 10 | 123257402 | intronic |         | .       |            |
| rs3135819  | FGFR2 | 10 | 123241122 | intronic |         | .       |            |
| rs2278202  | FGFR2 | 10 | 123243197 | intronic |         | .       |            |
| rs2981433  | FGFR2 | 10 | 123287727 | intronic |         | .       |            |
| rs2912754  | FGFR2 | 10 | 123261694 | intronic |         | .       |            |
| rs3135810  | FGFR2 | 10 | 123242780 | intronic |         | .       |            |
| rs1649202  | FGFR2 | 10 | 123240625 | intronic |         | .       |            |
| rs1613776  | FGFR2 | 10 | 123244834 | intronic |         | .       |            |
| rs2981434  | FGFR2 | 10 | 123287703 | intronic |         | .       |            |
| rs2912774  | FGFR2 | 10 | 123348662 | intronic |         | .       |            |
| rs2912759  | FGFR2 | 10 | 123269711 | intronic |         | .       |            |
| rs2912787  | FGFR2 | 10 | 123325538 | intronic |         | .       |            |
| rs2981449  | FGFR2 | 10 | 123325755 | intronic |         | .       |            |
| rs3135730  | FGFR2 | 10 | 123325794 | intronic |         | .       |            |
| rs11814493 | FGFR2 | 10 | 123317185 | intronic |         | .       |            |
| rs2162540  | FGFR2 | 10 | 123352136 | intronic |         | .       |            |
| rs3116478  | FGFR2 | 10 | 123335800 | intronic |         | .       |            |

|            |       |    |           |          |  |   |  |
|------------|-------|----|-----------|----------|--|---|--|
| rs3135748  | FGFR2 | 10 | 123310025 | intronic |  | . |  |
| rs2981581  | FGFR2 | 10 | 123352382 | intronic |  | . |  |
| rs2981582  | FGFR2 | 10 | 123352317 | intronic |  | . |  |
| rs2420942  | FGFR2 | 10 | 123277742 | intronic |  | . |  |
| rs3135734  | FGFR2 | 10 | 123324889 | intronic |  | . |  |
| rs2981432  | FGFR2 | 10 | 123326646 | intronic |  | . |  |
| rs10736303 | FGFR2 | 10 | 123334457 | intronic |  | . |  |
| rs2433759  | FGFR2 | 10 | 123252532 | intronic |  | . |  |
| rs17541509 | FGFR2 | 10 | 123285620 | intronic |  | . |  |
| rs2981439  | FGFR2 | 10 | 123282561 | intronic |  | . |  |
| rs3135807  | FGFR2 | 10 | 123244677 | intronic |  | . |  |
| rs1219643  | FGFR2 | 10 | 123348355 | intronic |  | . |  |
| rs1649200  | FGFR2 | 10 | 123243730 | intronic |  | . |  |
| rs3135785  | FGFR2 | 10 | 123260007 | intronic |  | . |  |
| rs7090018  | FGFR2 | 10 | 123268889 | intronic |  | . |  |
| rs2162539  | FGFR2 | 10 | 123261519 | intronic |  | . |  |
| rs1219648  | FGFR2 | 10 | 123346190 | intronic |  | . |  |
| rs2981575  | FGFR2 | 10 | 123346116 | intronic |  | . |  |
| rs2303568  | FGFR2 | 10 | 123323962 | intronic |  | . |  |
| rs1649163  | FGFR2 | 10 | 123240287 | intronic |  | . |  |
| rs3798234  | FRK   | 6  | 116316235 | intronic |  | . |  |
| rs1193609  | FRK   | 6  | 116298479 | intronic |  | . |  |
| rs3777427  | FRK   | 6  | 116278377 | intronic |  | . |  |
| rs3798235  | FRK   | 6  | 116315408 | intronic |  | . |  |
| rs9488818  | FRK   | 6  | 116300452 | intronic |  | . |  |

|            |      |    |           |          |  |   |  |
|------------|------|----|-----------|----------|--|---|--|
| rs3777425  | FRK  | 6  | 116278817 | intronic |  | . |  |
| rs10456902 | FRK  | 6  | 116333742 | intronic |  | . |  |
| rs11153594 | FRK  | 6  | 116354591 | intronic |  | . |  |
| rs9374588  | FRK  | 6  | 116311701 | intronic |  | . |  |
| rs9400883  | FRK  | 6  | 116306113 | intronic |  | . |  |
| rs9387379  | FRK  | 6  | 116290349 | intronic |  | . |  |
| rs3822856  | FRK  | 6  | 116316103 | intronic |  | . |  |
| rs9387380  | FRK  | 6  | 116327579 | intronic |  | . |  |
| rs3798231  | FRK  | 6  | 116317638 | intronic |  | . |  |
| rs496311   | FRK  | 6  | 116274730 | intronic |  | . |  |
| rs1193608  | FRK  | 6  | 116298792 | intronic |  | . |  |
| rs12202641 | FRK  | 6  | 116314634 | intronic |  | . |  |
| rs6927766  | FRK  | 6  | 116290682 | intronic |  | . |  |
| rs3798232  | FRK  | 6  | 116317444 | intronic |  | . |  |
| rs12524293 | FRK  | 6  | 116369110 | intronic |  | . |  |
| rs9488829  | FRK  | 6  | 116355105 | intronic |  | . |  |
| rs9320553  | FRK  | 6  | 116330942 | intronic |  | . |  |
| rs7758899  | FRK  | 6  | 116267345 | intronic |  | . |  |
| rs546418   | FRK  | 6  | 116301913 | intronic |  | . |  |
| rs544757   | FRK  | 6  | 116302050 | intronic |  | . |  |
| rs6568921  | FRK  | 6  | 116373616 | intronic |  | . |  |
| rs1035940  | INSR | 19 | 7199978   | intronic |  | . |  |
| rs4804304  | INSR | 19 | 7140525   | intronic |  | . |  |
| rs8104314  | INSR | 19 | 7212256   | intronic |  | . |  |
| rs3815902  | INSR | 19 | 7166138   | intronic |  | . |  |

|            |      |    |         |          |         |         |            |
|------------|------|----|---------|----------|---------|---------|------------|
| rs2963     | INSR | 19 | 7163154 | exonic   | AAG-AAA | Lys-Lys | synonymous |
| rs7245757  | INSR | 19 | 7187628 | intronic |         | .       |            |
| rs7508679  | INSR | 19 | 7222832 | intronic |         | .       |            |
| rs4804424  | INSR | 19 | 7229677 | intronic |         | .       |            |
| rs2860173  | INSR | 19 | 7129086 | intronic |         | .       |            |
| rs1035942  | INSR | 19 | 7199803 | intronic |         | .       |            |
| rs16994298 | INSR | 19 | 7170882 | intronic |         | .       |            |
| rs10415589 | INSR | 19 | 7170935 | intronic |         | .       |            |
| rs10500204 | INSR | 19 | 7182963 | intronic |         | .       |            |
| rs2042901  | INSR | 19 | 7204394 | intronic |         | .       |            |
| rs16994185 | INSR | 19 | 7140801 | intronic |         | .       |            |
| rs7248104  | INSR | 19 | 7224431 | intronic |         | .       |            |
| rs890862   | INSR | 19 | 7233604 | intronic |         | .       |            |
| rs7245562  | INSR | 19 | 7218135 | intronic |         | .       |            |
| rs2059807  | INSR | 19 | 7166109 | intronic |         | .       |            |
| rs8101064  | INSR | 19 | 7293119 | intronic |         | .       |            |
| rs16994200 | INSR | 19 | 7141871 | intronic |         | .       |            |
| rs919275   | INSR | 19 | 7261441 | intronic |         | .       |            |
| rs4804416  | INSR | 19 | 7223848 | intronic |         | .       |            |
| rs2229434  | INSR | 19 | 7142921 | exonic   | CAC-CAT | His-His | synonymous |
| rs3745546  | INSR | 19 | 7211816 | intronic |         | .       |            |
| rs10404166 | INSR | 19 | 7281735 | intronic |         | .       |            |
| rs3745545  | INSR | 19 | 7211841 | intronic |         | .       |            |
| rs2229430  | INSR | 19 | 7142843 | exonic   | GCC-GCG | Ala-Ala | synonymous |
| rs8109559  | INSR | 19 | 7171629 | intronic |         | .       |            |

|            |      |    |         |          |         |         |            |
|------------|------|----|---------|----------|---------|---------|------------|
| rs8108622  | INSR | 19 | 7182753 | intronic |         | .       |            |
| rs2229431  | INSR | 19 | 7141775 | exonic   | TTG-TTA | Leu-Leu | synonymous |
| rs10416429 | INSR | 19 | 7230438 | intronic |         | .       |            |
| rs6510975  | INSR | 19 | 7266878 | intronic |         | .       |            |
| rs16990074 | INSR | 19 | 7137351 | intronic |         | .       |            |
| rs3786681  | INSR | 19 | 7168933 | intronic |         | .       |            |
| rs4804219  | INSR | 19 | 7265908 | intronic |         | .       |            |
| rs2962     | INSR | 19 | 7163065 | exonic   | TTG-TTA | Leu-Leu | synonymous |
| rs8107575  | INSR | 19 | 7165539 | intronic |         | .       |            |
| rs11667110 | INSR | 19 | 7136609 | intronic |         | .       |            |
| rs7254358  | INSR | 19 | 7199341 | intronic |         | .       |            |
| rs4804368  | INSR | 19 | 7190290 | intronic |         | .       |            |
| rs10426094 | INSR | 19 | 7205240 | intronic |         | .       |            |
| rs4804403  | INSR | 19 | 7216771 | intronic |         | .       |            |
| rs3786680  | INSR | 19 | 7183551 | intronic |         | .       |            |
| rs891088   | INSR | 19 | 7184762 | intronic |         | .       |            |
| rs17253937 | INSR | 19 | 7184801 | intronic |         | .       |            |
| rs10404318 | INSR | 19 | 7247627 | intronic |         | .       |            |
| rs12459488 | INSR | 19 | 7206073 | intronic |         | .       |            |
| rs10424224 | INSR | 19 | 7240481 | intronic |         | .       |            |
| rs6510956  | INSR | 19 | 7169276 | intronic |         | .       |            |
| rs8103883  | INSR | 19 | 7203422 | intronic |         | .       |            |
| rs1035939  | INSR | 19 | 7188979 | intronic |         | .       |            |
| rs4804415  | INSR | 19 | 7223819 | intronic |         | .       |            |
| rs1864193  | INSR | 19 | 7114213 | UTR3     |         | .       |            |



|            |      |    |           |          |         |         |        |
|------------|------|----|-----------|----------|---------|---------|--------|
| rs16994314 | INSR | 19 | 7176974   | intronic |         | .       |        |
| rs316623   | LTK  | 15 | 41801081  | intronic |         | .       |        |
| rs316617   | LTK  | 15 | 41795900  | UTR3     |         | .       |        |
| rs41735    | MET  | 7  | 116435416 | intronic |         | .       |        |
| rs10487353 | MET  | 7  | 116323936 | intronic |         | .       |        |
| rs2283053  | MET  | 7  | 116427019 | intronic |         | .       |        |
| rs6566     | MET  | 7  | 116438418 | UTR3     |         | .       |        |
| rs38841    | MET  | 7  | 116319926 | intronic |         | .       |        |
| rs10215153 | MET  | 7  | 116399131 | intronic |         | .       |        |
| rs38852    | MET  | 7  | 116354525 | intronic |         | .       |        |
| rs2299433  | MET  | 7  | 116330878 | intronic |         | .       |        |
| rs2237717  | MET  | 7  | 116405387 | intronic |         | .       |        |
| rs41736    | MET  | 7  | 116435768 | exonic   | GAC-GAT | Asp-Asp | benign |
| rs38857    | MET  | 7  | 116365413 | intronic |         | .       |        |
| rs2896191  | MET  | 7  | 116334044 | intronic |         | .       |        |
| rs6978135  | MET  | 7  | 116430362 | intronic |         | .       |        |
| rs38847    | MET  | 7  | 116325326 | intronic |         | .       |        |
| rs4566974  | MET  | 7  | 116334058 | intronic |         | .       |        |
| rs39747    | MET  | 7  | 116321039 | intronic |         | .       |        |
| rs17138943 | MET  | 7  | 116342280 | intronic |         | .       |        |
| rs12535996 | MET  | 7  | 116325149 | intronic |         | .       |        |
| rs10243024 | MET  | 7  | 116346603 | intronic |         | .       |        |
| rs10232307 | MET  | 7  | 116369187 | intronic |         | .       |        |
| rs2237712  | MET  | 7  | 116338658 | intronic |         | .       |        |
| rs40239    | MET  | 7  | 116317877 | intronic |         | .       |        |

|            |       |   |           |          |         |         |        |
|------------|-------|---|-----------|----------|---------|---------|--------|
| rs17138980 | MET   | 7 | 116401669 | intronic |         | .       |        |
| rs714180   | MET   | 7 | 116319002 | intronic |         | .       |        |
| rs17138978 | MET   | 7 | 116398763 | intronic |         | .       |        |
| rs13223756 | MET   | 7 | 116397572 | exonic   | CAA-CAG | Gln-Gln | benign |
| rs11791891 | NTRK2 | 9 | 87512412  | intronic |         | .       |        |
| rs12340748 | NTRK2 | 9 | 87408381  | intronic |         | .       |        |
| rs10868246 | NTRK2 | 9 | 87608846  | intronic |         | .       |        |
| rs17087869 | NTRK2 | 9 | 87535285  | intronic |         | .       |        |
| rs1002261  | NTRK2 | 9 | 87566307  | intronic |         | .       |        |
| rs4361832  | NTRK2 | 9 | 87595734  | intronic |         | .       |        |
| rs7030960  | NTRK2 | 9 | 87620420  | intronic |         | .       |        |
| rs12552902 | NTRK2 | 9 | 87401314  | intronic |         | .       |        |
| rs11140790 | NTRK2 | 9 | 87478250  | intronic |         | .       |        |
| rs2277193  | NTRK2 | 9 | 87574009  | intronic |         | .       |        |
| rs4877900  | NTRK2 | 9 | 87632318  | intronic |         | .       |        |
| rs10116287 | NTRK2 | 9 | 87477274  | intronic |         | .       |        |
| rs10125469 | NTRK2 | 9 | 87620094  | intronic |         | .       |        |
| rs11140800 | NTRK2 | 9 | 87508137  | intronic |         | .       |        |
| rs1822421  | NTRK2 | 9 | 87423106  | intronic |         | .       |        |
| rs10123600 | NTRK2 | 9 | 87624633  | intronic |         | .       |        |
| rs12002424 | NTRK2 | 9 | 87480828  | intronic |         | .       |        |
| rs17087700 | NTRK2 | 9 | 87404873  | intronic |         | .       |        |
| rs4578034  | NTRK2 | 9 | 87587782  | intronic |         | .       |        |
| rs7855888  | NTRK2 | 9 | 87452058  | intronic |         | .       |        |
| rs12238351 | NTRK2 | 9 | 87618840  | intronic |         | .       |        |

|            |       |   |          |          |   |
|------------|-------|---|----------|----------|---|
| rs2489162  | NTRK2 | 9 | 87333742 | intronic | . |
| rs2165893  | NTRK2 | 9 | 87531424 | intronic | . |
| rs17390220 | NTRK2 | 9 | 87533875 | intronic | . |
| rs1443446  | NTRK2 | 9 | 87533909 | intronic | . |
| rs763623   | NTRK2 | 9 | 87539664 | intronic | . |
| rs4877890  | NTRK2 | 9 | 87552671 | intronic | . |
| rs17087898 | NTRK2 | 9 | 87553211 | intronic | . |
| rs7019555  | NTRK2 | 9 | 87614445 | intronic | . |
| rs4631550  | NTRK2 | 9 | 87614813 | intronic | . |
| rs1565446  | NTRK2 | 9 | 87616968 | intronic | . |
| rs1565445  | NTRK2 | 9 | 87617071 | intronic | . |
| rs1490405  | NTRK2 | 9 | 87622385 | intronic | . |
| rs1490404  | NTRK2 | 9 | 87622530 | intronic | . |
| rs984430   | NTRK2 | 9 | 87582827 | intronic | . |
| rs7048015  | NTRK2 | 9 | 87478135 | intronic | . |
| rs10121750 | NTRK2 | 9 | 87288033 | intronic | . |
| rs1187329  | NTRK2 | 9 | 87289280 | intronic | . |
| rs11140785 | NTRK2 | 9 | 87466777 | intronic | . |
| rs10115908 | NTRK2 | 9 | 87623385 | intronic | . |
| rs1187328  | NTRK2 | 9 | 87289257 | intronic | . |
| rs4075562  | NTRK2 | 9 | 87595866 | intronic | . |
| rs11140755 | NTRK2 | 9 | 87391861 | intronic | . |
| rs17088022 | NTRK2 | 9 | 87613933 | intronic | . |
| rs1899641  | NTRK2 | 9 | 87409367 | intronic | . |
| rs3739804  | NTRK2 | 9 | 87421631 | intronic | . |

|            |       |   |          |          |  |   |  |
|------------|-------|---|----------|----------|--|---|--|
| rs17087884 | NTRK2 | 9 | 87548647 | intronic |  | . |  |
| rs13289538 | NTRK2 | 9 | 87400217 | intronic |  | . |  |
| rs1596360  | NTRK2 | 9 | 87579148 | intronic |  | . |  |
| rs4142910  | NTRK2 | 9 | 87625097 | intronic |  | . |  |
| rs12555204 | NTRK2 | 9 | 87453154 | intronic |  | . |  |
| rs4877894  | NTRK2 | 9 | 87590382 | intronic |  | . |  |
| rs12552641 | NTRK2 | 9 | 87453052 | intronic |  | . |  |
| rs1778913  | NTRK2 | 9 | 87435737 | intronic |  | . |  |
| rs7867174  | NTRK2 | 9 | 87381476 | intronic |  | . |  |
| rs11140778 | NTRK2 | 9 | 87447158 | intronic |  | . |  |
| rs1539676  | NTRK2 | 9 | 87390167 | intronic |  | . |  |
| rs17087705 | NTRK2 | 9 | 87408352 | intronic |  | . |  |
| rs7045296  | NTRK2 | 9 | 87620240 | intronic |  | . |  |
| rs4877895  | NTRK2 | 9 | 87613323 | intronic |  | . |  |
| rs4406490  | NTRK2 | 9 | 87600797 | intronic |  | . |  |
| rs1006446  | NTRK2 | 9 | 87566393 | intronic |  | . |  |
| rs2799482  | NTRK2 | 9 | 87408950 | intronic |  | . |  |
| rs17326762 | NTRK2 | 9 | 87357451 | intronic |  | . |  |
| rs4075561  | NTRK2 | 9 | 87595771 | intronic |  | . |  |
| rs4877289  | NTRK2 | 9 | 87484613 | intronic |  | . |  |
| rs10780688 | NTRK2 | 9 | 87446444 | intronic |  | . |  |
| rs10780690 | NTRK2 | 9 | 87478172 | intronic |  | . |  |
| rs41511747 | NTRK2 | 9 | 87434256 | intronic |  | . |  |
| rs1122530  | NTRK2 | 9 | 87464352 | intronic |  | . |  |
| rs17087840 | NTRK2 | 9 | 87520389 | intronic |  | . |  |

|            |       |   |          |          |  |   |  |
|------------|-------|---|----------|----------|--|---|--|
| rs2799483  | NTRK2 | 9 | 87408978 | intronic |  | . |  |
| rs1439050  | NTRK2 | 9 | 87288193 | intronic |  | . |  |
| rs10512154 | NTRK2 | 9 | 87441475 | intronic |  | . |  |
| rs1443445  | NTRK2 | 9 | 87534158 | intronic |  | . |  |
| rs4877892  | NTRK2 | 9 | 87560461 | intronic |  | . |  |
| rs3654     | NTRK2 | 9 | 87430491 | UTR3     |  | . |  |
| rs7038866  | NTRK2 | 9 | 87387907 | intronic |  | . |  |
| rs3780642  | NTRK2 | 9 | 87553145 | intronic |  | . |  |
| rs1490406  | NTRK2 | 9 | 87622339 | intronic |  | . |  |
| rs3780645  | NTRK2 | 9 | 87559794 | intronic |  | . |  |
| rs7857957  | NTRK2 | 9 | 87621612 | intronic |  | . |  |
| rs1187351  | NTRK2 | 9 | 87295077 | intronic |  | . |  |
| rs1187349  | NTRK2 | 9 | 87295571 | intronic |  | . |  |
| rs9314735  | NTRK2 | 9 | 87445656 | intronic |  | . |  |
| rs10512155 | NTRK2 | 9 | 87445916 | intronic |  | . |  |
| rs1822420  | NTRK2 | 9 | 87467276 | intronic |  | . |  |
| rs10512156 | NTRK2 | 9 | 87523188 | intronic |  | . |  |
| rs10512159 | NTRK2 | 9 | 87608999 | intronic |  | . |  |
| rs17088001 | NTRK2 | 9 | 87610439 | intronic |  | . |  |
| rs1565447  | NTRK2 | 9 | 87616907 | intronic |  | . |  |
| rs2378672  | NTRK2 | 9 | 87631034 | intronic |  | . |  |
| rs12341232 | NTRK2 | 9 | 87612473 | intronic |  | . |  |
| rs6559840  | NTRK2 | 9 | 87575500 | intronic |  | . |  |
| rs4314726  | NTRK2 | 9 | 87589244 | intronic |  | . |  |
| rs1221     | NTRK2 | 9 | 87492610 | UTR3     |  | . |  |

|            |       |   |          |          |  |   |  |
|------------|-------|---|----------|----------|--|---|--|
| rs1187341  | NTRK2 | 9 | 87311715 | intronic |  | . |  |
| rs1627784  | NTRK2 | 9 | 87428866 | UTR3     |  | . |  |
| rs6559836  | NTRK2 | 9 | 87533389 | intronic |  | . |  |
| rs3780640  | NTRK2 | 9 | 87537284 | intronic |  | . |  |
| rs7857558  | NTRK2 | 9 | 87382415 | intronic |  | . |  |
| rs7044057  | NTRK2 | 9 | 87348718 | intronic |  | . |  |
| rs11140748 | NTRK2 | 9 | 87361520 | intronic |  | . |  |
| rs7868500  | NTRK2 | 9 | 87464384 | intronic |  | . |  |
| rs1387926  | NTRK2 | 9 | 87632663 | intronic |  | . |  |
| rs3780634  | NTRK2 | 9 | 87488718 | UTR3     |  | . |  |
| rs17087704 | NTRK2 | 9 | 87405751 | intronic |  | . |  |
| rs10735569 | NTRK2 | 9 | 87460236 | intronic |  | . |  |
| rs7043641  | NTRK2 | 9 | 87595051 | intronic |  | . |  |
| rs11140753 | NTRK2 | 9 | 87378471 | intronic |  | . |  |
| rs12683368 | NTRK2 | 9 | 87340841 | intronic |  | . |  |
| rs6559839  | NTRK2 | 9 | 87575426 | intronic |  | . |  |
| rs12685845 | NTRK2 | 9 | 87464336 | intronic |  | . |  |
| rs11140784 | NTRK2 | 9 | 87459423 | intronic |  | . |  |
| rs7853120  | NTRK2 | 9 | 87367303 | intronic |  | . |  |
| rs720141   | NTRK2 | 9 | 87419506 | intronic |  | . |  |
| rs3780625  | NTRK2 | 9 | 87287408 | intronic |  | . |  |
| rs10116453 | NTRK2 | 9 | 87363201 | intronic |  | . |  |
| rs11790718 | NTRK2 | 9 | 87554231 | intronic |  | . |  |
| rs17087710 | NTRK2 | 9 | 87409862 | intronic |  | . |  |
| rs7859023  | NTRK2 | 9 | 87474420 | intronic |  | . |  |

|            |       |   |          |          |   |
|------------|-------|---|----------|----------|---|
| rs1443440  | NTRK2 | 9 | 87406168 | intronic | . |
| rs11140758 | NTRK2 | 9 | 87410825 | intronic | . |
| rs2277192  | NTRK2 | 9 | 87573977 | intronic | . |
| rs17087580 | NTRK2 | 9 | 87347756 | intronic | . |
| rs1659401  | NTRK2 | 9 | 87324683 | intronic | . |
| rs3780632  | NTRK2 | 9 | 87352788 | intronic | . |
| rs1209068  | NTRK2 | 9 | 87340518 | intronic | . |
| rs7045882  | NTRK2 | 9 | 87542683 | intronic | . |
| rs7873811  | NTRK2 | 9 | 87483094 | intronic | . |
| rs13295599 | NTRK2 | 9 | 87584025 | intronic | . |
| rs1778933  | NTRK2 | 9 | 87324411 | intronic | . |
| rs12336534 | NTRK2 | 9 | 87633948 | intronic | . |
| rs6559838  | NTRK2 | 9 | 87553563 | intronic | . |
| rs17087835 | NTRK2 | 9 | 87512699 | intronic | . |
| rs17087726 | NTRK2 | 9 | 87434460 | intronic | . |
| rs9802671  | NTRK2 | 9 | 87597827 | intronic | . |
| rs10746752 | NTRK2 | 9 | 87595716 | intronic | . |
| rs7855989  | NTRK2 | 9 | 87556420 | intronic | . |
| rs12342902 | NTRK2 | 9 | 87554440 | intronic | . |
| rs17087837 | NTRK2 | 9 | 87519680 | intronic | . |
| rs7041260  | NTRK2 | 9 | 87318528 | intronic | . |
| rs1187352  | NTRK2 | 9 | 87293457 | intronic | . |
| rs17332552 | NTRK2 | 9 | 87583632 | intronic | . |
| rs11788063 | NTRK2 | 9 | 87508674 | intronic | . |
| rs10868228 | NTRK2 | 9 | 87447546 | intronic | . |

|            |       |    |           |          |         |         |            |
|------------|-------|----|-----------|----------|---------|---------|------------|
| rs1936435  | NTRK2 | 9  | 87383777  | intronic |         | .       |            |
| rs17087959 | NTRK2 | 9  | 87575920  | intronic |         | .       |            |
| rs17088013 | NTRK2 | 9  | 87612996  | intronic |         | .       |            |
| rs10780687 | NTRK2 | 9  | 87442302  | intronic |         | .       |            |
| rs2075759  | TNK1  | 17 | 7292685   | UTR3     |         | .       |            |
| rs2269762  | TNK1  | 17 | 7285831   | intronic |         | .       |            |
| rs2075760  | TNK1  | 17 | 7292726   | UTR3     |         | .       |            |
| rs12948090 | TNK1  | 17 | 7285104   | intronic |         | .       |            |
| rs881753   | TNK2  | 3  | 195606770 | intronic |         | .       |            |
| rs11720557 | TNK2  | 3  | 195628636 | intronic |         | .       |            |
| rs3747669  | TNK2  | 3  | 195615376 | exonic   | TCA-TCG | Ser-Ser | synonymous |
| rs11185498 | TNK2  | 3  | 195628815 | intronic |         | .       |            |
| rs6421308  | TNK2  | 3  | 195628272 | intronic |         | .       |            |
| rs6837324  | TXK   | 4  | 48127262  | intronic |         | .       |            |
| rs2704401  | TXK   | 4  | 48118202  | intronic |         | .       |            |
| rs6850108  | TXK   | 4  | 48078593  | intronic |         | .       |            |
| rs17574051 | TXK   | 4  | 48094534  | intronic |         | .       |            |
| rs17674224 | TXK   | 4  | 48077329  | intronic |         | .       |            |
| rs10938521 | TXK   | 4  | 48113219  | intronic |         | .       |            |
| rs1466998  | TXK   | 4  | 48097400  | intronic |         | .       |            |
| rs1567217  | TXK   | 4  | 48068783  | UTR3     |         | .       |            |
| rs2661528  | TXK   | 4  | 48115734  | intronic |         | .       |            |
| rs13118073 | TXK   | 4  | 48094275  | intronic |         | .       |            |
| rs2262771  | TXK   | 4  | 48122948  | intronic |         | .       |            |
| rs1396054  | TXK   | 4  | 48076724  | intronic |         | .       |            |



|            |     |   |          |          |         |         |            |
|------------|-----|---|----------|----------|---------|---------|------------|
| rs7679010  | TXK | 4 | 48083885 | intronic |         | .       |            |
| rs1003873  | TXK | 4 | 48096781 | intronic |         | .       |            |
| rs16861011 | TXK | 4 | 48135608 | intronic |         | .       |            |
| rs3852106  | TXK | 4 | 48080536 | intronic |         | .       |            |
| rs4589663  | TXK | 4 | 48080573 | intronic |         | .       |            |
| rs6832282  | TXK | 4 | 48070953 | intronic |         | .       |            |
| rs10007288 | TXK | 4 | 48090135 | intronic |         | .       |            |
| rs3805187  | TXK | 4 | 48076562 | intronic |         | .       |            |
| rs12646088 | TXK | 4 | 48080649 | intronic |         | .       |            |
| rs17470585 | TXK | 4 | 48091768 | exonic   | CCG-CCA | Pro-Pro | synonymous |
| rs16860943 | TXK | 4 | 48095127 | intronic |         | .       |            |
| rs1396049  | TXK | 4 | 48107758 | intronic |         | .       |            |
| rs16860968 | TXK | 4 | 48120871 | intronic |         | .       |            |
| rs13133062 | TXK | 4 | 48124057 | intronic |         | .       |            |
| rs7658300  | TXK | 4 | 48115264 | exonic   | CTG-CCG | Leu-Pro | missense   |

**Supprting Table S3:** The genetic backgrounds of 17 commonly over-activated kinases  
**Affymetrix Genome-Wide Human Mapping SNP6.0**  
**Array**

**The copy numbers of 17 commonly over-activated kinases**

| <b>Genes</b> | <b>BEL-7402</b> | <b>HePG2</b> | <b>Hep3B</b> | <b>Huh-7</b> | <b>QGY-7703</b> | <b>SK-Hep-1</b> | <b>SMMC-7721</b> | <b>ZIP177</b> |
|--------------|-----------------|--------------|--------------|--------------|-----------------|-----------------|------------------|---------------|
| ABL1         | 4               | 2            | 3            | 4            | 6               | 2               | 3                | 3             |
| ALK          | 3               | 3            | 2            | 4            | 3               | 3               | 3                | 2             |
| EGFR         | 3               | 2            | 4            | 5            | 4               | 4               | 3                | 2             |
| EphA1        | 3               | 2            | 3            | 5            | 3               | 3               | 3                | 3             |
| EphA3        | 2               | 2            | 2            | 8            | 3               | 3               | 2                | 2             |
| EphA5        | 2               | 2            | 4            | 3            | 3               | 2               | 2                | 2             |
| EphB2        | 3               | 2            | 2            | 4            | 3               | 3               | 3                | 3             |
| EphB3        | 3               | 2            | 3            | 4            | 4               | 2               | 3                | 3             |
| FGFR2        | 2               | 3            | 2            | 4            | 3               | 3               | 2                | 2             |
| FRK          | 2               | 2            | 3            | 5            | 3               | 2               | 2                | 2             |
| INSR         | 2               | 2            | 3            | 4            | 3               | 2               | 2                | 2             |
| LTK          | 3               | 2            | 3            | 3            | 4               | 2               | 3                | 3             |
| MET          | 2               | 2            | 3            | 6            | 3               | 4               | 2                | 2             |
| NTRK2        | 3               | 2            | 3            | 5            | 5               | 2               | 3                | 3             |
| TNK1         | 3               | 2            | 3            | 4            | 4               | 3               | 3                | 3             |
| TNK2         | 3               | 2            | 3            | 3            | 4               | 3               | 3                | 3             |
| TXK          | 2               | 2            | 4            | 2            | 3               | 2               | 2                | 2             |

**Supporting Table S5:** The activation of ALK, FGFR2 and EphA5 kinases in liver cancer PDX array

| p-ALK Location | Tissue Type | Cytoplasm          |                | Cell membrane      |                | Nucleus            |                | Notes |
|----------------|-------------|--------------------|----------------|--------------------|----------------|--------------------|----------------|-------|
|                |             | Staining intensity | Positive ratio | Staining intensity | Positive ratio | Staining intensity | Positive ratio |       |
| A1             | Liver PDX   | 1                  | 70%            |                    |                | 1                  | 5%             |       |
| A2             | Liver PDX   | 1-2                | 85%            |                    |                |                    |                |       |
| A3             | Liver PDX   | 0.5                | 35%            |                    |                |                    |                |       |
| A4             | Liver PDX   | 0                  | 0%             | 2-3                | 70%            |                    |                |       |
| A5             | Liver PDX   | 0.5                | 90%            |                    |                |                    |                |       |
| A6             | Liver PDX   | 0.5-1              | 75%            | 2-3                | 40%            |                    |                |       |
| A7             | Liver PDX   | 0.5-1              | 80%            |                    |                |                    |                |       |
| A8             | Liver PDX   | 0.5                | 20%            | 1-3                | 55%            |                    |                |       |
| A9             | Liver PDX   | 0.5                | 45%            |                    |                |                    |                |       |
| A10            | Liver PDX   | 0.5                | 30%            |                    |                |                    |                |       |
| A11            | Liver PDX   | 0                  | 0%             |                    |                |                    |                |       |
| A12            | Liver PDX   | 0                  | 0%             |                    |                | 0.5                | 70%            |       |
| B1             | Liver PDX   | 0.5-1              | 80%            |                    |                |                    |                |       |
| B2             | Liver PDX   | 1                  | 85%            | 1                  | 25%            |                    |                |       |
| B3             | Liver PDX   | 1                  | 20%            |                    |                |                    |                |       |
| B4             | Liver PDX   | 0.5-1              | 60%            |                    |                |                    |                |       |
| B5             | Liver PDX   | 0                  | 0%             |                    |                |                    |                |       |
| B6             | Liver PDX   | 0                  | 0%             | 2                  | 60%            |                    |                |       |
| B7             | Liver PDX   | 0                  | 0%             |                    |                |                    |                |       |

|     |           |       |     |       |     |       |     |  |
|-----|-----------|-------|-----|-------|-----|-------|-----|--|
| B8  | Liver PDX | 0     | 0%  | 2     | 25% |       |     |  |
| B9  | Liver PDX | 1     | 20% | 1     | 15% |       |     |  |
| B10 | Liver PDX | 0     | 0%  |       |     |       |     |  |
| B11 | Liver PDX | 0.5-1 | 40% |       |     |       |     |  |
| B12 | Liver PDX | 0     | 0%  |       |     |       |     |  |
| C1  | Liver PDX | 1     | 70% | 1-2   | 55% |       |     |  |
| C2  | Liver PDX | 0.5   | 30% | 0.5   | 20% | 0.5   | 80% |  |
| C3  | Liver PDX | 0     | 0%  |       |     |       |     |  |
| C4  | Liver PDX | 0.5-1 | 90% |       |     |       |     |  |
| C5  | Liver PDX | 0     | 0%  |       |     | 0.5-1 | 95% |  |
| C6  | Liver PDX | 0     | 0%  | 0.5-1 | 85% |       |     |  |
| C7  | Liver PDX | 0     | 0%  | 1-2   | 65% | 0.5   | 35% |  |
| C8  | Liver PDX | 0.5   | 20% | 3     | 85% |       |     |  |
| C9  | Liver PDX | 0.5-1 | 85% |       |     | 1     | 95% |  |
| C10 | Liver PDX | 0.5   | 20% |       |     | 0.5   | 35% |  |
| C11 | Liver PDX | 0     | 0%  | 0.5   | 85% |       |     |  |
| C12 | Liver PDX | 0     | 0%  | 2     | 90% |       |     |  |
| D1  | Liver PDX | 0     | 0%  | 2     | 55% | 0.5   | 10% |  |
| D2  | Liver PDX | 0     | 0%  | 2-3   | 95% |       |     |  |
| D3  | Liver PDX | 0.5   | 85% | 2-3   | 85% |       |     |  |
| D4  | Liver PDX | 1     | 15% | 3     | 95% |       |     |  |
| D5  | Liver PDX | 0     | 0%  | 1     | 25% |       |     |  |
| D6  | Liver PDX | 0.5   | 15% | 2     | 75% |       |     |  |
| D7  | Liver PDX | 0     | 0%  |       |     |       |     |  |
| D8  | Liver PDX | 0     | 0%  |       |     | 0.5   | 90% |  |

|     |           |       |     |       |     |     |     |  |
|-----|-----------|-------|-----|-------|-----|-----|-----|--|
| D9  | Liver PDX | 1     | 80% |       |     |     |     |  |
| D10 | Liver PDX | 1     | 80% |       |     |     |     |  |
| D11 | Liver PDX | 0.5-1 | 75% |       |     | 0.5 | 10% |  |
| D12 | Liver PDX | 0.5   | 60% |       |     |     |     |  |
| E1  | Liver PDX | 0     | 0%  | 0.5-1 | 75% |     |     |  |
| E2  | Liver PDX | 0     | 0%  | 2-3   | 85% |     |     |  |
| E3  | Liver PDX | 0     | 0%  |       |     |     |     |  |
| E4  | Liver PDX | 0     | 0%  | 3     | 80% |     |     |  |
| E5  | Liver PDX | 0     | 0%  |       |     |     |     |  |
| E6  | Liver PDX | 0.5   | 70% |       |     |     |     |  |
| E7  | Liver PDX | 0.5-1 | 85% | 0.5-1 | 90% |     |     |  |
| E8  | Liver PDX | 0     | 0%  | 2     | 60% |     |     |  |
| E9  | Liver PDX | 1     | 75% | 1     | 60% |     |     |  |
| E10 | Liver PDX | 0.5   | 65% | 0.5   | 20% | 0.5 | 80% |  |
| E11 | Liver PDX | 0.5   | 90% |       |     |     |     |  |
| E12 | Liver PDX | 0.5   | 90% |       |     | 0.5 | 80% |  |
| F1  | Liver PDX | 0     | 0%  |       |     | 0.5 | 95% |  |
| F2  | Liver PDX | 0.5   | 80% | 1     | 85% |     |     |  |
| F3  | Liver PDX | 2     | 20% |       |     |     |     |  |
| F4  | Liver PDX | 1     | 30% | 2-3   | 70% |     |     |  |
| F5  | Liver PDX | 1     | 5%  | 2     | 90% |     |     |  |
| F6  | Liver PDX | 1-2   | 90% |       |     |     |     |  |
| F7  | Liver PDX | 0.5   | 15% | 1     | 80% |     |     |  |
| F8  | Liver PDX | 0     | 0%  | 1-2   | 95% |     |     |  |
| F9  | Liver PDX | 0     | 0%  | 2     | 65% |     |     |  |

|     |           |       |     |     |     |     |     |  |
|-----|-----------|-------|-----|-----|-----|-----|-----|--|
| F10 | Liver PDX | 0.5-1 | 85% | 2   | 95% |     |     |  |
| F11 | Liver PDX | 1-2   | 90% |     |     |     |     |  |
| F12 | Liver PDX | 0.5   | 20% | 2   | 90% |     |     |  |
| G1  | Liver PDX | 0     | 0%  | 1   | 85% |     |     |  |
| G2  | Liver PDX | 0.5   | 45% | 1   | 65% |     |     |  |
| G3  | Liver PDX | 0     | 0%  | 1   | 90% |     |     |  |
| G4  | Liver PDX | 0.5   | 55% |     |     | 0.5 | 85% |  |
| G5  | Liver PDX | 0.5-1 | 75% |     |     |     |     |  |
| G6  | Liver PDX | 0.5   | 70% |     |     |     |     |  |
| G7  | Liver PDX | 0.5-1 | 45% |     |     |     |     |  |
| G8  | Liver PDX | 0.5   | 60% |     |     |     |     |  |
| G9  | Liver PDX | 0     | 0%  |     |     |     |     |  |
| G10 | Liver PDX | 0     | 0%  | 1   | 75% |     |     |  |
| G11 | Liver PDX | 0     | 0%  |     |     |     |     |  |
| G12 | Liver PDX | 0     | 0%  | 2   | 65% |     |     |  |
| H1  | Liver PDX | 0     | 0%  | 2   | 70% |     |     |  |
| H2  | Liver PDX | 0.5   | 10% | 2   | 75% |     |     |  |
| H3  | Liver PDX | 0.5-1 | 85% | 1   | 65% |     |     |  |
| H4  | Liver PDX | 0     | 0%  | 2   | 85% |     |     |  |
| H5  | Liver PDX | 1     | 85% | 0.5 | 60% |     |     |  |
| H6  | Liver PDX | 0.5   | 5%  | 0.5 | 15% | 0.5 | 80% |  |
| H7  | Liver PDX | 0.5   | 85% |     |     |     |     |  |
| H8  | Liver PDX | 0.5   | 85% |     |     |     |     |  |
| H9  | Liver PDX | 0     | 0%  | 1   | 20% |     |     |  |
| H10 | Liver PDX | 0     | 0%  | 2   | 90% |     |     |  |

|     |           |     |     |     |     |  |  |  |
|-----|-----------|-----|-----|-----|-----|--|--|--|
| H11 | Liver PDX | 0   | 0%  |     |     |  |  |  |
| H12 | Liver PDX | 0.5 | 30% | 1-2 | 90% |  |  |  |

| p-FGFR2 Location | Tissue Type | Cytoplasm          |                | Cell membrane      |                | Nucleus            |                | Notes |
|------------------|-------------|--------------------|----------------|--------------------|----------------|--------------------|----------------|-------|
|                  |             | Staining intensity | Positive ratio | Staining intensity | Positive ratio | Staining intensity | Positive ratio |       |
| A1               | Liver PDX   | 1-2                | 40%            | 0                  | 0%             | 1                  | 5%             |       |
| A2               | Liver PDX   | 0                  | 0%             | 0                  | 0%             | 0.5                | 90%            |       |
| A3               | Liver PDX   | 0                  | 0%             | 1                  | 10%            |                    |                |       |
| A4               | Liver PDX   | 0                  | 0%             | 2                  | 15%            |                    |                |       |
| A5               | Liver PDX   | 0                  | 0%             | 0                  | 0%             |                    |                |       |
| A6               | Liver PDX   | 2                  | 15%            | 1-2                | 30%            |                    |                |       |
| A7               | Liver PDX   | 0                  | 0%             | 1                  | 25%            |                    |                |       |
| A8               | Liver PDX   | 0                  | 0%             | 1-2                | 30%            |                    |                |       |
| A9               | Liver PDX   | 0                  | 0%             | 0                  | 0%             |                    |                |       |
| A10              | Liver PDX   | 0.5                | 10%            | 0                  | 0%             | 0.5                | 5%             |       |
| A11              | Liver PDX   | 0                  | 0%             | 0                  | 0%             |                    |                |       |
| A12              | Liver PDX   | 0                  | 0%             | 0                  | 0%             | 0.5                | 95%            |       |
| B1               | Liver PDX   | 0                  | 0%             | 1                  | 85%            |                    |                |       |
| B2               | Liver PDX   | 0                  | 0%             | 0                  | 0%             | 0.5                | 40%            |       |
| B3               | Liver PDX   | 1                  | 5%             | 0                  | 0%             |                    |                |       |
| B4               | Liver PDX   | 0                  | 0%             | 0                  | 0%             |                    |                |       |
| B5               | Liver PDX   | 0                  | 0%             | 0                  | 0%             |                    |                |       |
| B6               | Liver PDX   | 0                  | 0%             | 0.5                | 35%            |                    |                |       |

|     |           |   |    |       |     |       |     |  |
|-----|-----------|---|----|-------|-----|-------|-----|--|
| B7  | Liver PDX | 0 | 0% | 0     | 0%  | 0.5   | 90% |  |
| B8  | Liver PDX | 0 | 0% | 2-3   | 75% |       |     |  |
| B9  | Liver PDX | 0 | 0% | 2-3   | 75% | 1     | 10% |  |
| B10 | Liver PDX | 0 | 0% | 0     | 0%  |       |     |  |
| B11 | Liver PDX | 0 | 0% | 0     | 0%  |       |     |  |
| B12 | Liver PDX | 0 | 0% | 1     | 10% |       |     |  |
| C1  | Liver PDX | 0 | 0% | 1     | 60% | 0.5   | 20% |  |
| C2  | Liver PDX | 0 | 0% | 0.5-1 | 45% | 0.5   | 80% |  |
| C3  | Liver PDX | 0 | 0% | 2     | 70% |       |     |  |
| C4  | Liver PDX | 0 | 0% | 0     | 0%  |       |     |  |
| C5  | Liver PDX | 0 | 0% | 0.5   | 5%  | 0.5   | 95% |  |
| C6  | Liver PDX | 0 | 0% | 0.5   | 10% |       |     |  |
| C7  | Liver PDX | 0 | 0% | 1     | 55% | 0.5   | 70% |  |
| C8  | Liver PDX | 0 | 0% | 2     | 80% |       |     |  |
| C9  | Liver PDX | 0 | 0% | 0     | 0%  | 0.5-1 | 90% |  |
| C10 | Liver PDX | 0 | 0% | 0     | 0%  | 0.5   | 80% |  |
| C11 | Liver PDX | 0 | 0% | 0     | 0%  |       |     |  |
| C12 | Liver PDX | 0 | 0% | 1     | 85% |       |     |  |
| D1  | Liver PDX | 0 | 0% | 1-2   | 30% |       |     |  |
| D2  | Liver PDX | 0 | 0% | 2-3   | 95% |       |     |  |
| D3  | Liver PDX | 0 | 0% | 1-3   | 95% |       |     |  |
| D4  | Liver PDX | 2 | 5% | 2-3   | 95% |       |     |  |
| D5  | Liver PDX | 0 | 0% | 2     | 10% |       |     |  |
| D6  | Liver PDX | 0 | 0% | 1     | 25% | 0.5   | 60% |  |
| D7  | Liver PDX | 0 | 0% | 0     | 0%  |       |     |  |



|     |           |       |     |       |     |       |     |  |
|-----|-----------|-------|-----|-------|-----|-------|-----|--|
| D8  | Liver PDX | 0     | 0%  | 0     | 0%  | 0.5-1 | 95% |  |
| D9  | Liver PDX | 0     | 0%  | 1     | 80% |       |     |  |
| D10 | Liver PDX | 0     | 0%  | 0     | 0%  | 0.5   | 95% |  |
| D11 | Liver PDX | 1     | 5%  | 0     | 0%  | 0.5   | 5%  |  |
| D12 | Liver PDX | 0     | 0%  | 0     | 0%  | 0.5   | 5%  |  |
| E1  | Liver PDX | 0     | 0%  | 0.5   | 20% |       |     |  |
| E2  | Liver PDX | 0.5   | 5%  | 1-2   | 75% |       |     |  |
| E3  | Liver PDX | 0     | 0%  | 0     | 0%  | 0     | 0%  |  |
| E4  | Liver PDX | 0     | 0%  | 2-3   | 80% | 0.5   | 5%  |  |
| E5  | Liver PDX | 0     | 0%  | 3     | 30% | 0.5   | 5%  |  |
| E6  | Liver PDX | 0     | 0%  | 1-2   | 40% |       |     |  |
| E7  | Liver PDX | 0     | 0%  | 1     | 80% |       |     |  |
| E8  | Liver PDX | 0.5   | 15% | 1-2   | 15% |       |     |  |
| E9  | Liver PDX | 0.5-1 | 10% | 1-2   | 75% |       |     |  |
| E10 | Liver PDX | 0     | 0%  | 0     | 0%  | 0.5-1 | 80% |  |
| E11 | Liver PDX | 0     | 0%  | 1     | 55% | 0.5   | 60% |  |
| E12 | Liver PDX | 0     | 0%  | 0     | 0%  | 0.5   | 75% |  |
| F1  | Liver PDX | 0     | 0%  | 0     | 0%  | 0.5   | 95% |  |
| F2  | Liver PDX | 0     | 0%  | 1-2   | 85% |       |     |  |
| F3  | Liver PDX | 0     | 0%  | 0.5-1 | 40% |       |     |  |
| F4  | Liver PDX | 0     | 0%  | 2-3   | 70% |       |     |  |
| F5  | Liver PDX | 2     | 5%  | 3     | 75% |       |     |  |
| F6  | Liver PDX | 0     | 0%  | 0     | 0%  | 0.5   | 95% |  |
| F7  | Liver PDX | 0     | 0%  | 1-2   | 60% |       |     |  |
| F8  | Liver PDX | 0     | 0%  | 2-3   | 70% |       |     |  |

|     |           |     |     |       |     |       |     |  |
|-----|-----------|-----|-----|-------|-----|-------|-----|--|
| F9  | Liver PDX | 0   | 0%  | 2     | 40% |       |     |  |
| F10 | Liver PDX | 1   | 15% | 2-3   | 90% |       |     |  |
| F11 | Liver PDX | 0   | 0%  | 0.5-1 | 60% |       |     |  |
| F12 | Liver PDX | 0   | 0%  | 2-3   | 80% |       |     |  |
| G1  | Liver PDX | 0   | 0%  | 0.5-1 | 60% |       |     |  |
| G2  | Liver PDX | 0.5 | 70% | 0.5-1 | 85% |       |     |  |
| G3  | Liver PDX | 0   | 0%  | 0.5-1 | 90% |       |     |  |
| G4  | Liver PDX | 0   | 0%  | 0     | 0%  | 0.5   | 90% |  |
| G5  | Liver PDX | 0   | 0%  | 1-2   | 80% |       |     |  |
| G6  | Liver PDX | 0   | 0%  | 0     | 0%  | 0.5   | 90% |  |
| G7  | Liver PDX | 0.5 | 20% | 0.5   | 15% |       |     |  |
| G8  | Liver PDX | 0   | 0%  | 0     | 0%  |       |     |  |
| G9  | Liver PDX | 0   | 0%  | 0     | 0%  |       |     |  |
| G10 | Liver PDX | 0   | 0%  | 2-3   | 10% |       |     |  |
| G11 | Liver PDX | 0   | 0%  | 0     | 0%  | 0.5   | 70% |  |
| G12 | Liver PDX | 0   | 0%  | 3     | 75% |       |     |  |
| H1  | Liver PDX | 0   | 0%  | 2-3   | 60% |       |     |  |
| H2  | Liver PDX | 0   | 0%  | 1     | 65% |       |     |  |
| H3  | Liver PDX | 0.5 | 10% | 0.5-1 | 85% |       |     |  |
| H4  | Liver PDX | 0   | 0%  | 2     | 55% |       |     |  |
| H5  | Liver PDX | 0   | 0%  | 0.5-1 | 45% |       |     |  |
| H6  | Liver PDX | 0   | 0%  | 0     | 0%  | 0.5-1 | 90% |  |
| H7  | Liver PDX | 0   | 0%  | 3     | 20% |       |     |  |
| H8  | Liver PDX | 0   | 0%  | 0     | 0%  |       |     |  |
| H9  | Liver PDX | 0   | 0%  | 1-2   | 60% | 0.5   | 90% |  |

|     |           |   |    |     |     |     |     |  |
|-----|-----------|---|----|-----|-----|-----|-----|--|
| H10 | Liver PDX | 0 | 0% | 1-2 | 90% |     |     |  |
| H11 | Liver PDX | 0 | 0% | 0   | 0%  | 0.5 | 55% |  |
| H12 | Liver PDX | 0 | 0% | 1-3 | 85% |     |     |  |

| p-EphA5 Location | Tissue Type | Cytoplasm          |                | Cell membrane      |                | Nucleus            |                | Notes |
|------------------|-------------|--------------------|----------------|--------------------|----------------|--------------------|----------------|-------|
|                  |             | Staining intensity | Positive ratio | Staining intensity | Positive ratio | Staining intensity | Positive ratio |       |
| A1               | Liver PDX   | 0.5-1              | 90%            | 0                  | 0%             |                    |                |       |
| A2               | Liver PDX   | 0.5                | 90%            | 0                  | 0%             | 0.5                | 90%            |       |
| A3               | Liver PDX   | 0                  | 0%             | 1-2                | 35%            |                    |                |       |
| A4               | Liver PDX   | 0.5                | 95%            | 2-3                | 45%            |                    |                |       |
| A5               | Liver PDX   | 0.5                | 90%            | 0                  | 0%             |                    |                |       |
| A6               | Liver PDX   | 2                  | 35%            | 1-3                | 85%            |                    |                |       |
| A7               | Liver PDX   | 0.5                | 20%            | 1-2                | 80%            |                    |                |       |
| A8               | Liver PDX   | 0                  | 0%             | 2                  | 75%            |                    |                |       |
| A9               | Liver PDX   | 0                  | 0%             | 0                  | 0%             |                    |                |       |
| A10              | Liver PDX   | 0.5                | 10%            | 1                  | 15%            |                    |                |       |
| A11              | Liver PDX   | 0                  | 0%             | 0                  | 0%             |                    |                |       |
| A12              | Liver PDX   | 0                  | 0%             | 1                  | 85%            |                    |                |       |
| B1               | Liver PDX   | 0                  | 0%             | 1-2                | 95%            |                    |                |       |
| B2               | Liver PDX   | 0.5                | 70%            | 1-2                | 30%            |                    |                |       |
| B3               | Liver PDX   | 0.5                | 10%            |                    |                |                    |                |       |
| B4               | Liver PDX   | 0                  | 0%             |                    |                |                    |                |       |
| B5               | Liver PDX   | 0                  | 0%             |                    |                |                    |                |       |
| B6               | Liver PDX   | 0                  | 0%             | 0.5-2              | 75%            |                    |                |       |
| B7               | Liver PDX   | 0.5                | 15%            |                    |                |                    |                |       |

|     |           |       |     |       |     |     |     |  |
|-----|-----------|-------|-----|-------|-----|-----|-----|--|
| B8  | Liver PDX | 0.5   | 75% | 1-2   | 25% |     |     |  |
| B9  | Liver PDX | 0     | 0%  | 2-3   | 65% |     |     |  |
| B10 | Liver PDX | 0.5   | 90% |       |     |     |     |  |
| B11 | Liver PDX | 0.5-1 | 80% |       |     |     |     |  |
| B12 | Liver PDX | 0     | 0%  |       |     |     |     |  |
| C1  | Liver PDX | 0.5   | 85% | 0.5   | 30% |     |     |  |
| C2  | Liver PDX | 0.5   | 75% | 2-3   | 70% |     |     |  |
| C3  | Liver PDX | 0     | 0%  | 3     | 55% |     |     |  |
| C4  | Liver PDX | 0.5   | 95% |       |     |     |     |  |
| C5  | Liver PDX | 0.5   | 80% |       |     | 0.5 | 90% |  |
| C6  | Liver PDX | 0     | 0%  | 1     | 95% |     |     |  |
| C7  | Liver PDX | 0.5   | 80% |       |     | 0.5 | 80% |  |
| C8  | Liver PDX | 0.5   | 85% | 0.5-1 | 75% |     |     |  |
| C9  | Liver PDX | 0.5-1 | 90% |       |     |     |     |  |
| C10 | Liver PDX | 0.5   | 15% |       |     | 0.5 | 80% |  |
| C11 | Liver PDX | 0     | 0%  | 1-2   | 85% |     |     |  |
| C12 | Liver PDX | 0.5   | 35% | 1-3   | 85% |     |     |  |
| D1  | Liver PDX | 0.5   | 20% | 0.5-1 | 70% |     |     |  |
| D2  | Liver PDX | 0.5   | 20% | 3     | 95% |     |     |  |
| D3  | Liver PDX | 0     | 0%  | 2-3   | 90% |     |     |  |
| D4  | Liver PDX | 0.5   | 10% | 3     | 85% |     |     |  |
| D5  | Liver PDX | 0     | 0%  | 1-2   | 20% |     |     |  |
| D6  | Liver PDX | 0.5-1 | 95% | 2     | 55% |     |     |  |
| D7  | Liver PDX | 0     | 0%  |       |     |     |     |  |
| D8  | Liver PDX | 0.5   | 80% | 0.5-1 | 65% |     |     |  |

|     |           |       |     |     |     |     |     |  |
|-----|-----------|-------|-----|-----|-----|-----|-----|--|
| D9  | Liver PDX | 0.5   | 55% | 1   | 80% |     |     |  |
| D10 | Liver PDX | 0.5   | 70% |     |     | 0.5 | 80% |  |
| D11 | Liver PDX | 0.5   | 90% |     |     | 0.5 | 90% |  |
| D12 | Liver PDX | 0     | 0%  |     |     | 0.5 | 95% |  |
| E1  | Liver PDX | 0.5   | 20% | 0.5 | 40% |     |     |  |
| E2  | Liver PDX | 0.5   | 10% | 2-3 | 80% |     |     |  |
| E3  | Liver PDX | 0     | 0%  |     |     |     |     |  |
| E4  | Liver PDX | 0     | 0%  | 2   | 90% |     |     |  |
| E5  | Liver PDX | 0     | 0%  | 2   | 65% |     |     |  |
| E6  | Liver PDX | 0.5   | 95% |     |     |     |     |  |
| E7  | Liver PDX | 0.5-1 | 90% |     |     |     |     |  |
| E8  | Liver PDX | 0.5   | 5%  | 1-2 | 35% |     |     |  |
| E9  | Liver PDX | 0.5   | 10% |     |     |     |     |  |
| E10 | Liver PDX | 0     | 0%  | 2-3 | 95% |     |     |  |
| E11 | Liver PDX | 0     | 0%  | 2   | 60% | 0.5 | 95% |  |
| E12 | Liver PDX | 0.5   | 95% |     |     | 0.5 | 95% |  |
| F1  | Liver PDX | 0     | 0%  |     |     | 0.5 | 90% |  |
| F2  | Liver PDX | 0     | 0%  | 1-2 | 80% |     |     |  |
| F3  | Liver PDX | 0     | 0%  | 0.5 | 60% | 0.5 | 80% |  |
| F4  | Liver PDX | 0.5   | 5%  | 1   | 70% |     |     |  |
| F5  | Liver PDX | 0     | 0%  | 1-2 | 95% |     |     |  |
| F6  | Liver PDX | 0     | 0%  |     |     |     |     |  |
| F7  | Liver PDX | 0     | 0%  | 1   | 90% |     |     |  |
| F8  | Liver PDX | 0.5   | 35% | 1-2 | 55% |     |     |  |
| F9  | Liver PDX | 0.5   | 85% | 1   | 70% |     |     |  |

|     |           |     |     |       |     |     |     |  |
|-----|-----------|-----|-----|-------|-----|-----|-----|--|
| F10 | Liver PDX | 0   | 0%  | 2     | 90% |     |     |  |
| F11 | Liver PDX | 0.5 | 15% | 2     | 65% |     |     |  |
| F12 | Liver PDX | 0.5 | 75% | 1     | 70% |     |     |  |
| G1  | Liver PDX | 0   | 0%  | 0.5-1 | 20% |     |     |  |
| G2  | Liver PDX | 0.5 | 15% | 1-2   | 40% |     |     |  |
| G3  | Liver PDX | 0   | 0%  |       |     |     |     |  |
| G4  | Liver PDX | 0.5 | 45% | 1     | 75% | 0.5 | 20% |  |
| G5  | Liver PDX | 0.5 | 25% | 0.5-1 | 85% |     |     |  |
| G6  | Liver PDX | 0.5 | 65% |       |     | 0.5 | 85% |  |
| G7  | Liver PDX | 0.5 | 85% |       |     | 0.5 | 90% |  |
| G8  | Liver PDX | 0   | 0%  |       |     |     |     |  |
| G9  | Liver PDX | 0   | 0%  |       |     |     |     |  |
| G10 | Liver PDX | 0   | 0%  | 1-2   | 80% |     |     |  |
| G11 | Liver PDX | 0   | 0%  |       |     | 0.5 | 80% |  |
| G12 | Liver PDX | 0.5 | 30% | 2     | 85% | 0.5 | 60% |  |
| H1  | Liver PDX | 0   | 0%  | 2     | 70% |     |     |  |
| H2  | Liver PDX | 0   | 0%  |       |     |     |     |  |
| H3  | Liver PDX | 0   | 0%  | 2     | 5%  |     |     |  |
| H4  | Liver PDX | 0   | 0%  | 1     | 45% |     |     |  |
| H5  | Liver PDX | 0   | 0%  | 0     | 0%  |     |     |  |
| H6  | Liver PDX | 0.5 | 20% | 1-2   | 95% |     |     |  |
| H7  | Liver PDX | 0   | 0%  | 2     | 35% |     |     |  |
| H8  | Liver PDX | 0.5 | 10% |       |     |     |     |  |
| H9  | Liver PDX | 0   | 0%  |       |     | 0.5 | 85% |  |
| H10 | Liver PDX | 0   | 0%  | 0.5   | 10% |     |     |  |

|     |           |     |     |     |     |     |     |  |
|-----|-----------|-----|-----|-----|-----|-----|-----|--|
| H11 | Liver PDX | 0   | 0%  |     |     | 0.5 | 95% |  |
| H12 | LiverPDX  | 0.5 | 90% | 0.5 | 15% |     |     |  |
